# Supplementary material
Source: PubMed Central journal article supplement (PMC4164201)
Supplement: NIHMS626364-supplement-10.pdf [file NIHMS626364-supplement-10.pdf]

<sup>1</sup>H NMR\_lactocillin methyl ester\_d6-DMSO\_600 MHz\_3mm

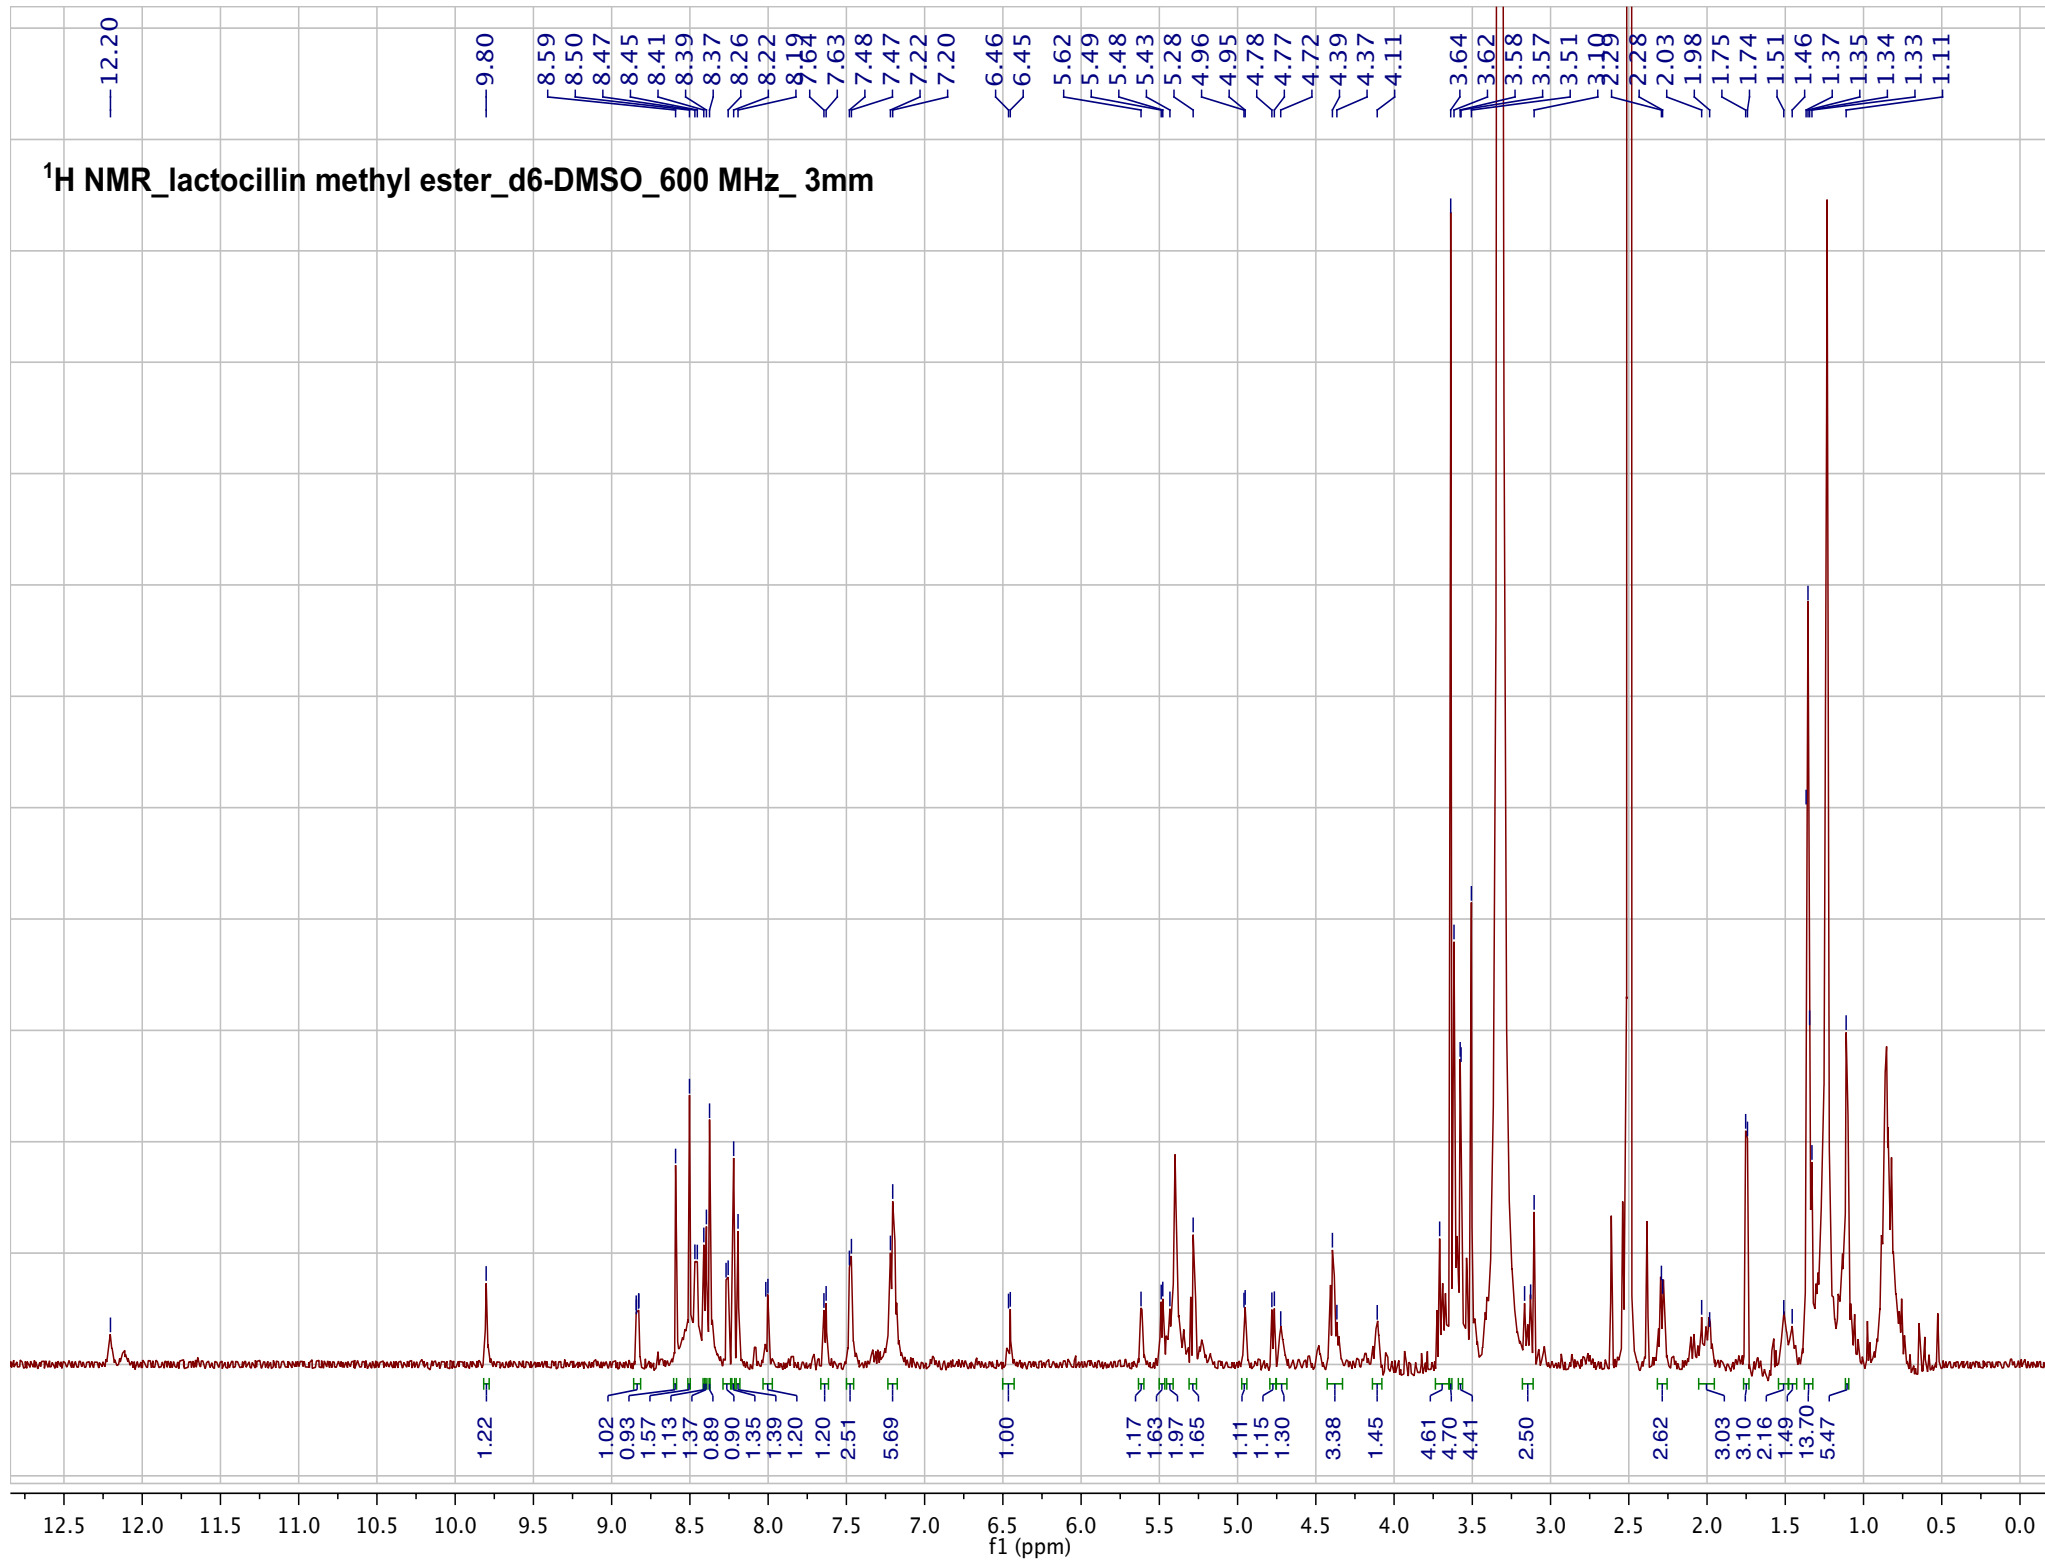

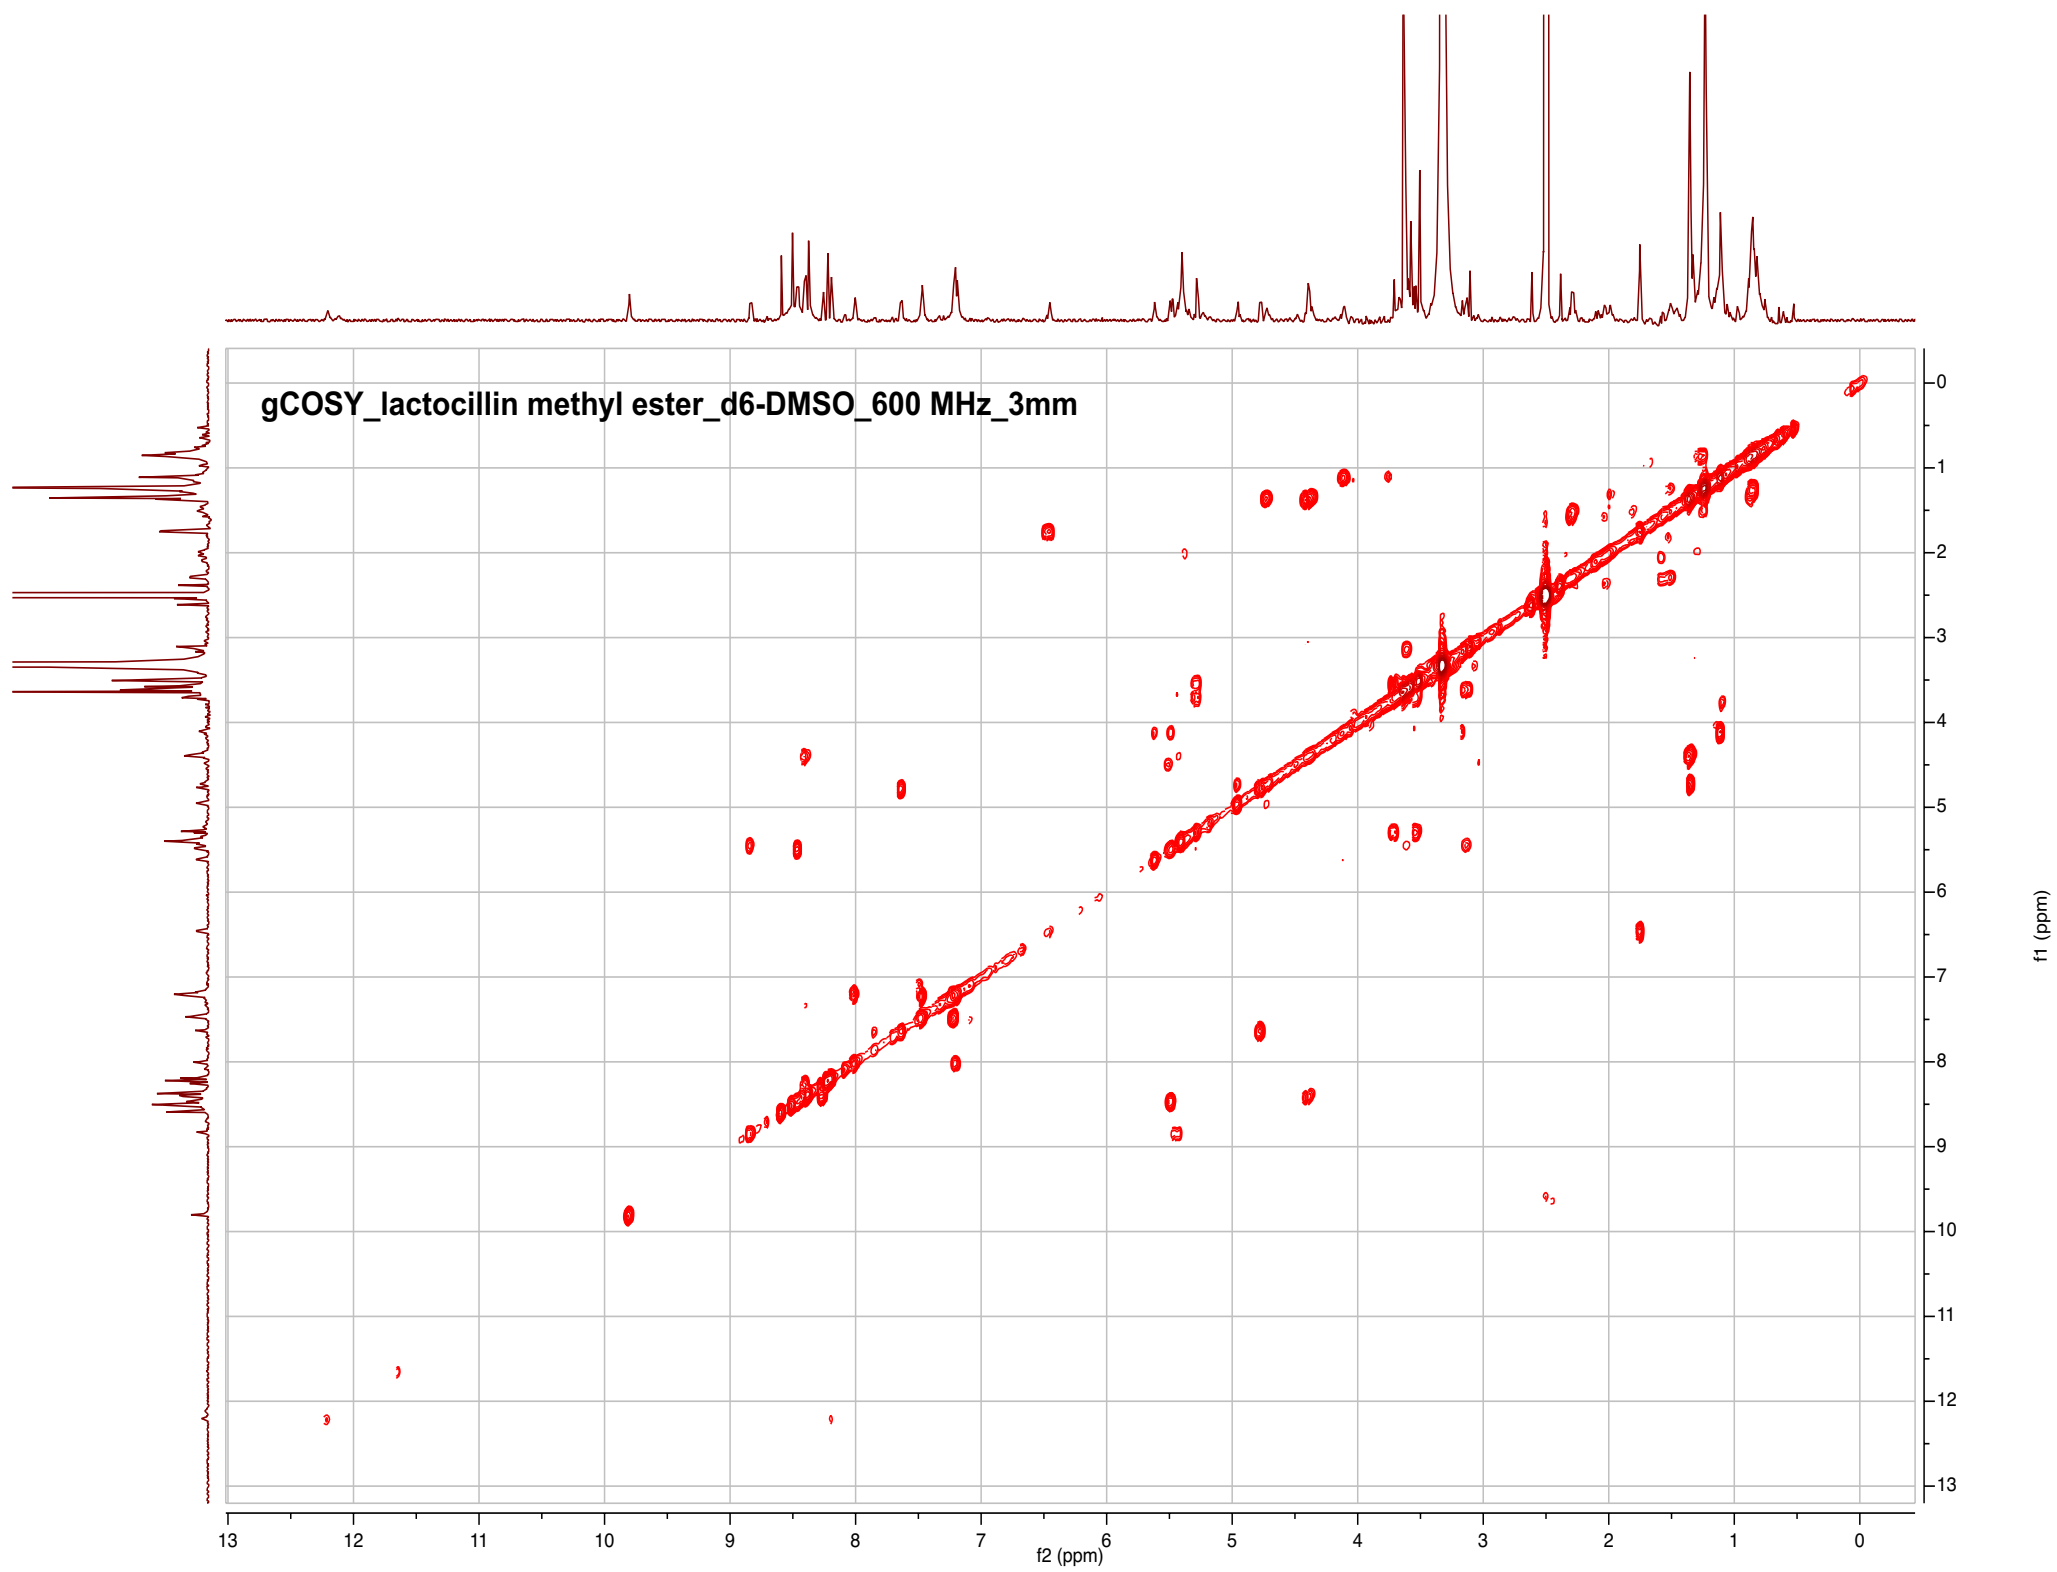

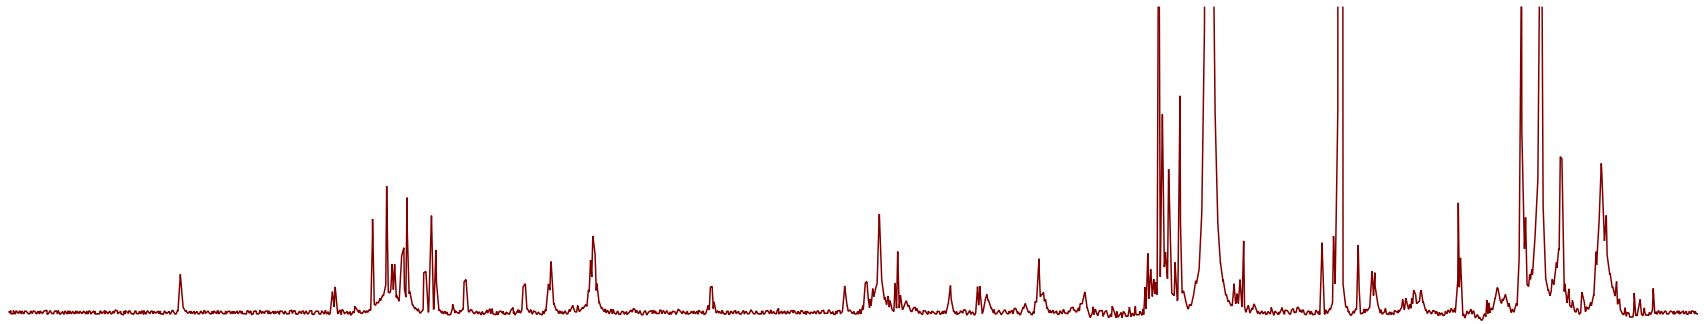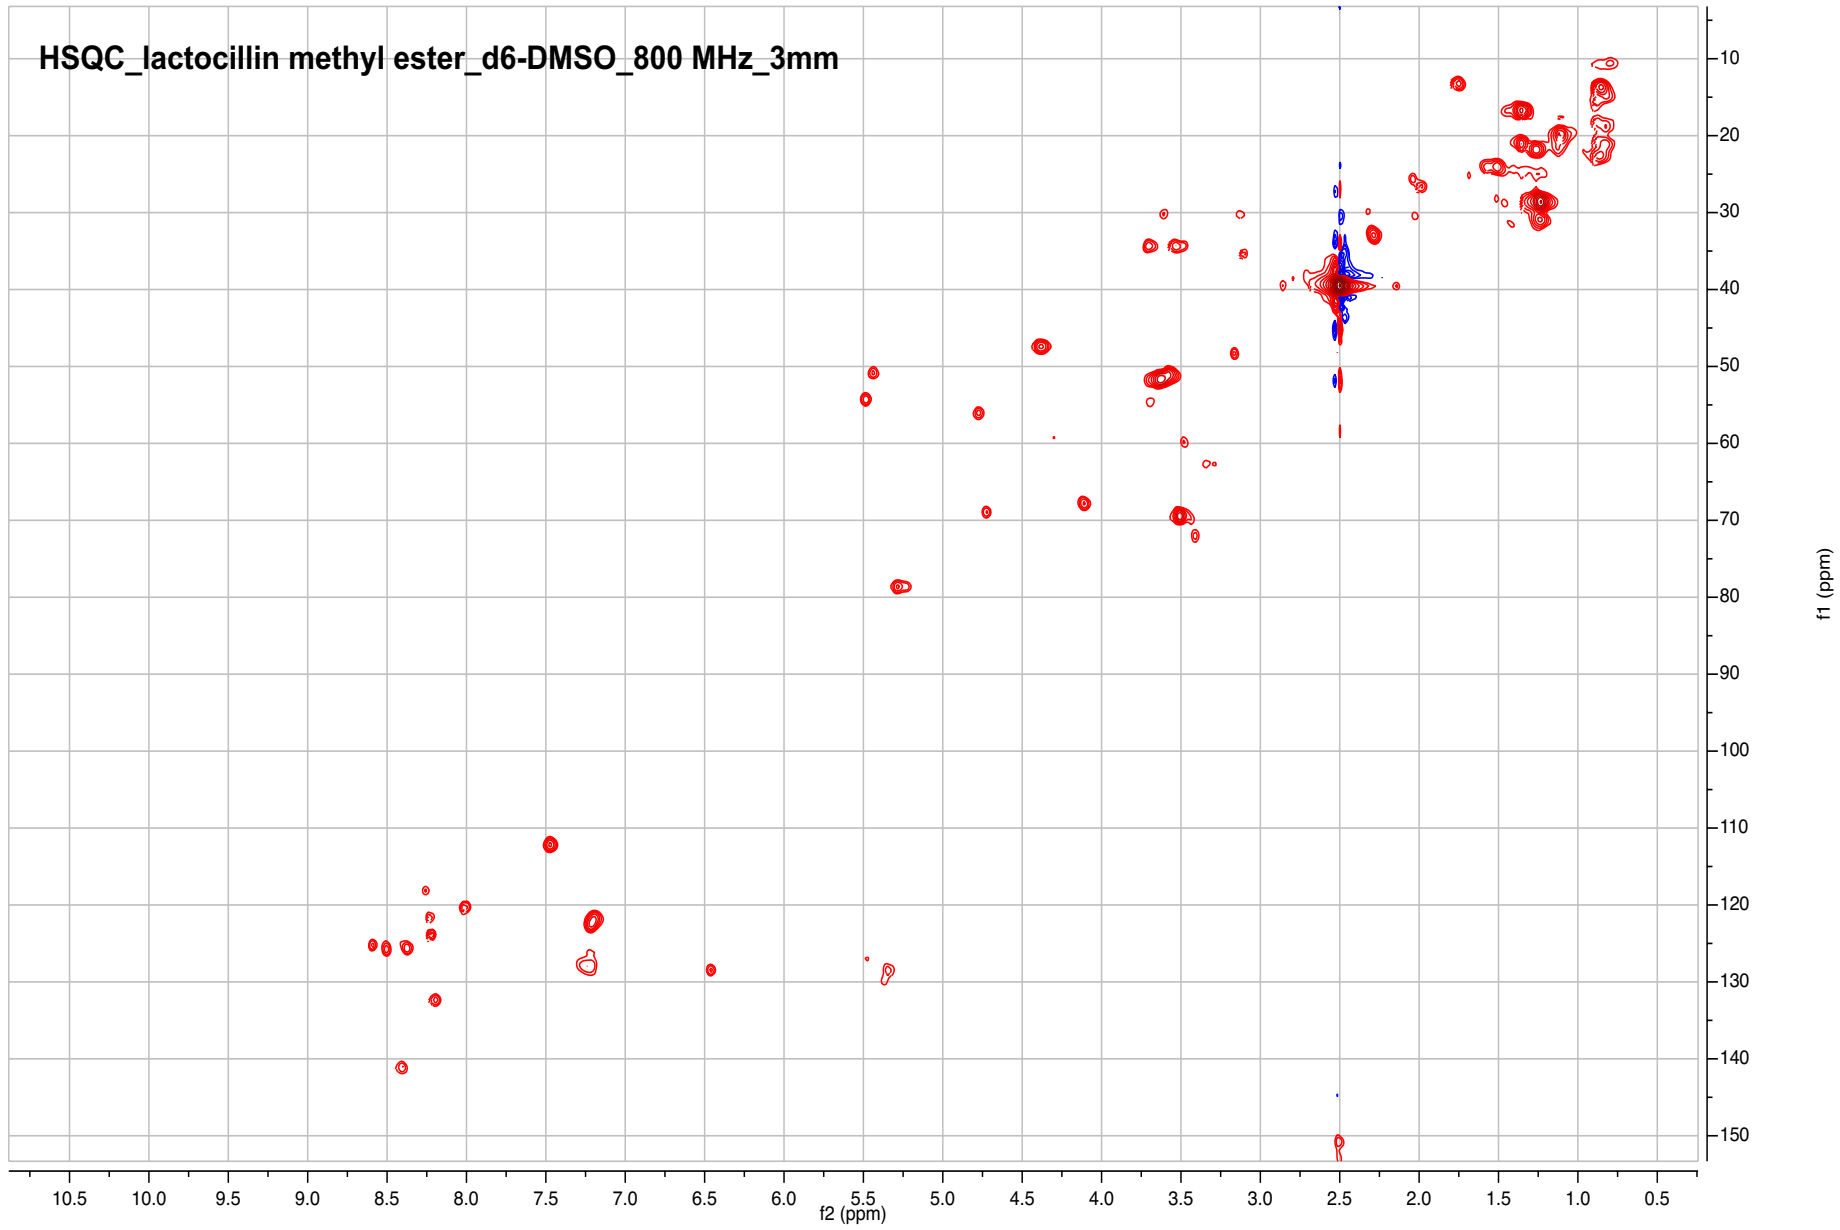

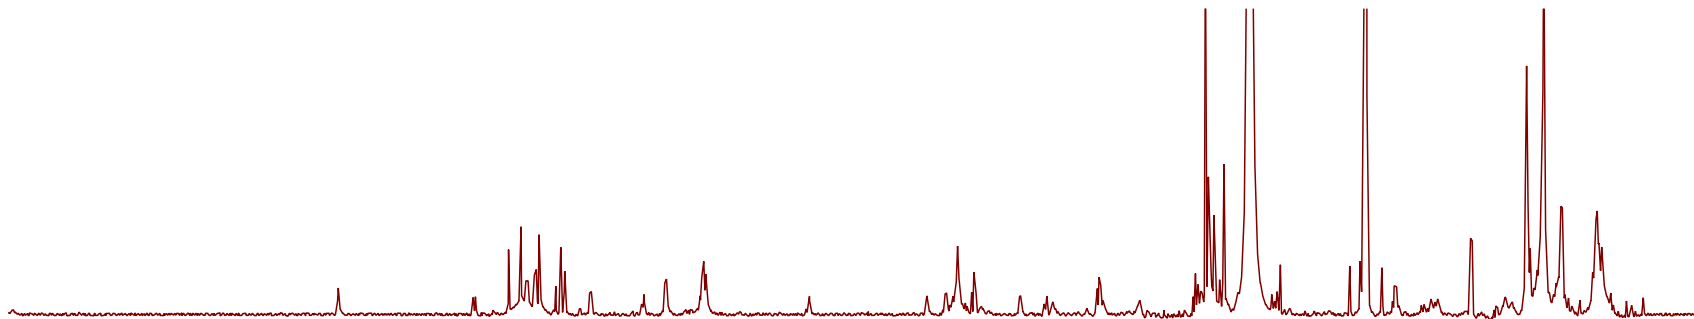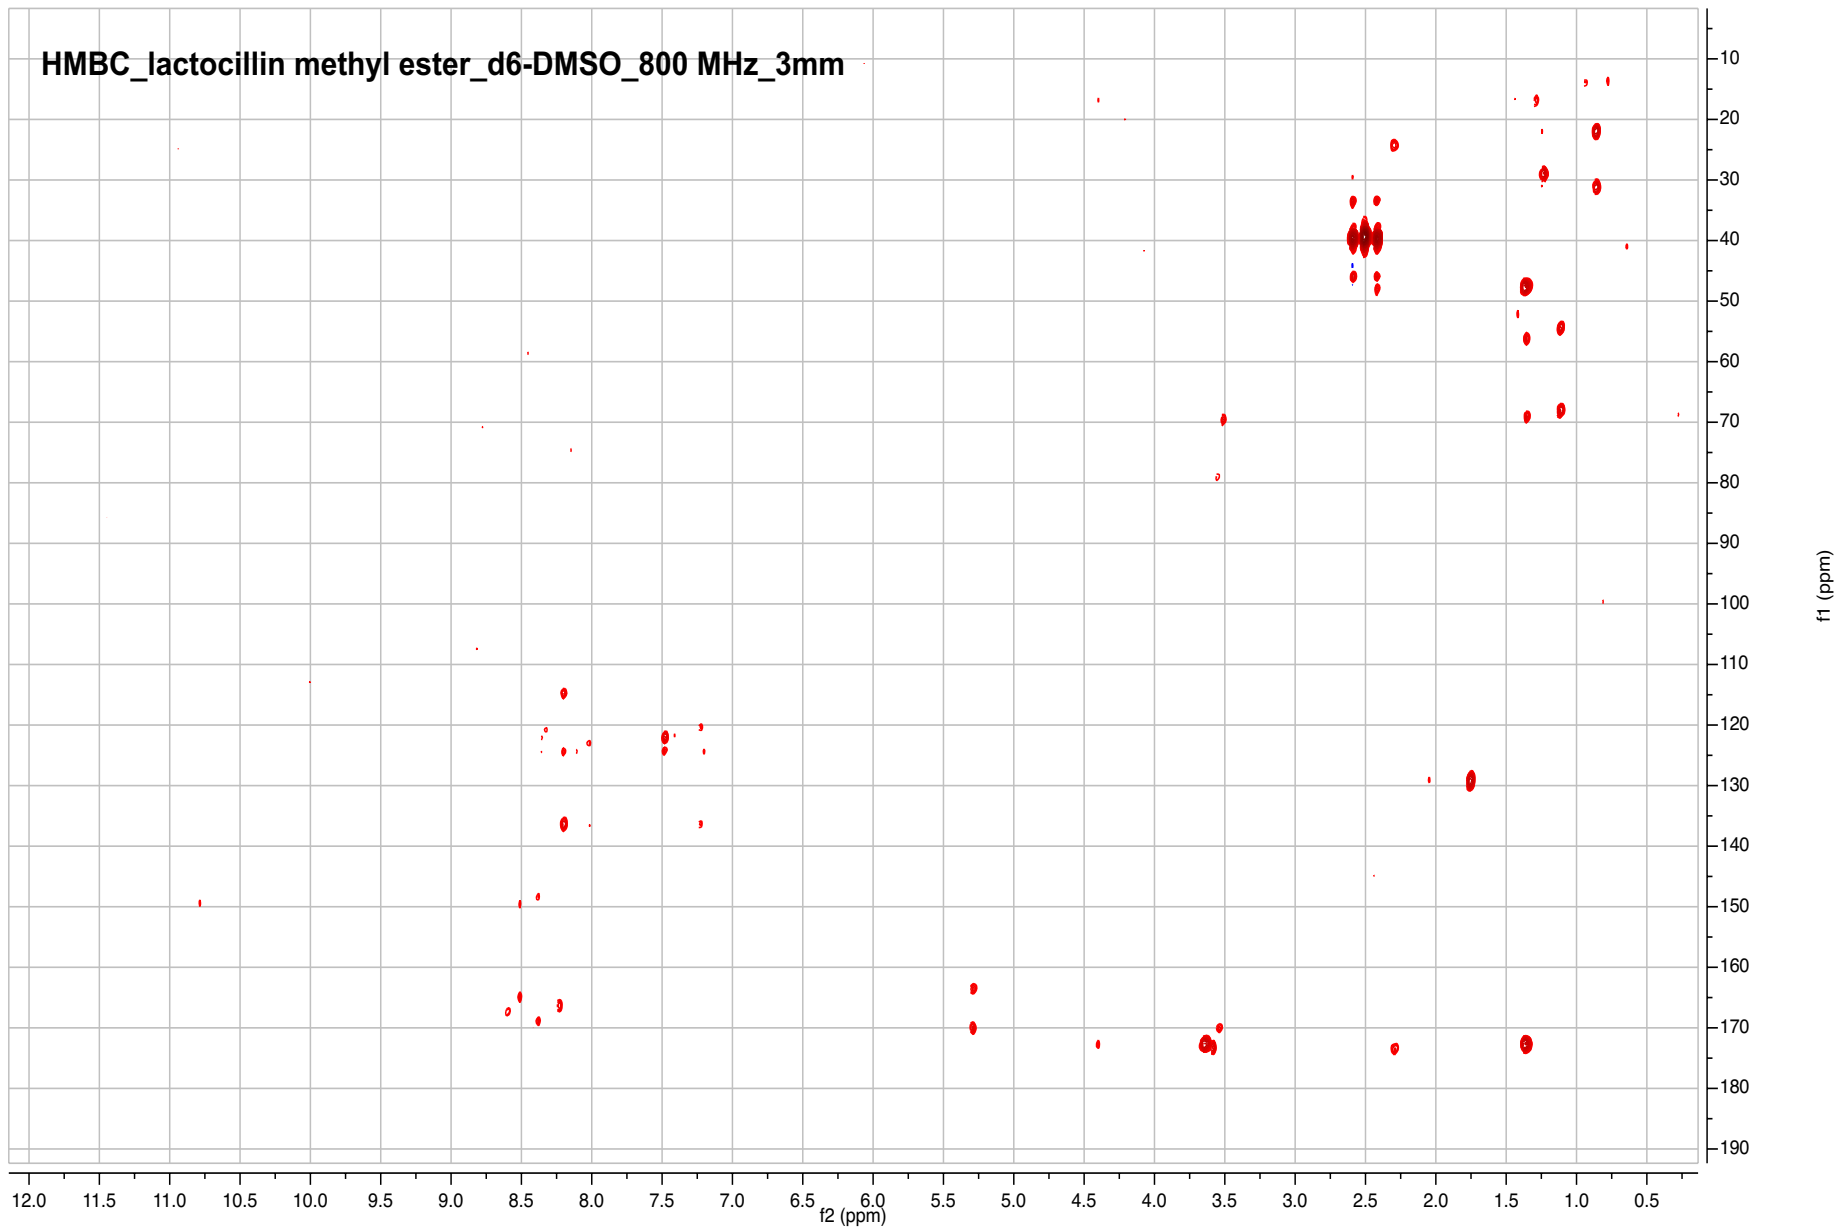

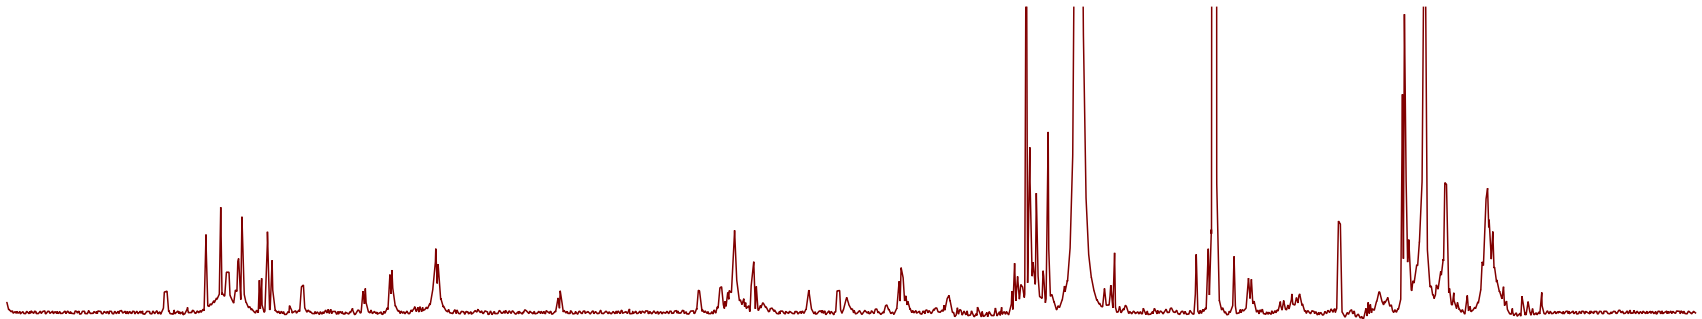

ROESY\_lactocillin methyl ester\_d6-DMSO\_800 MHz\_3mm

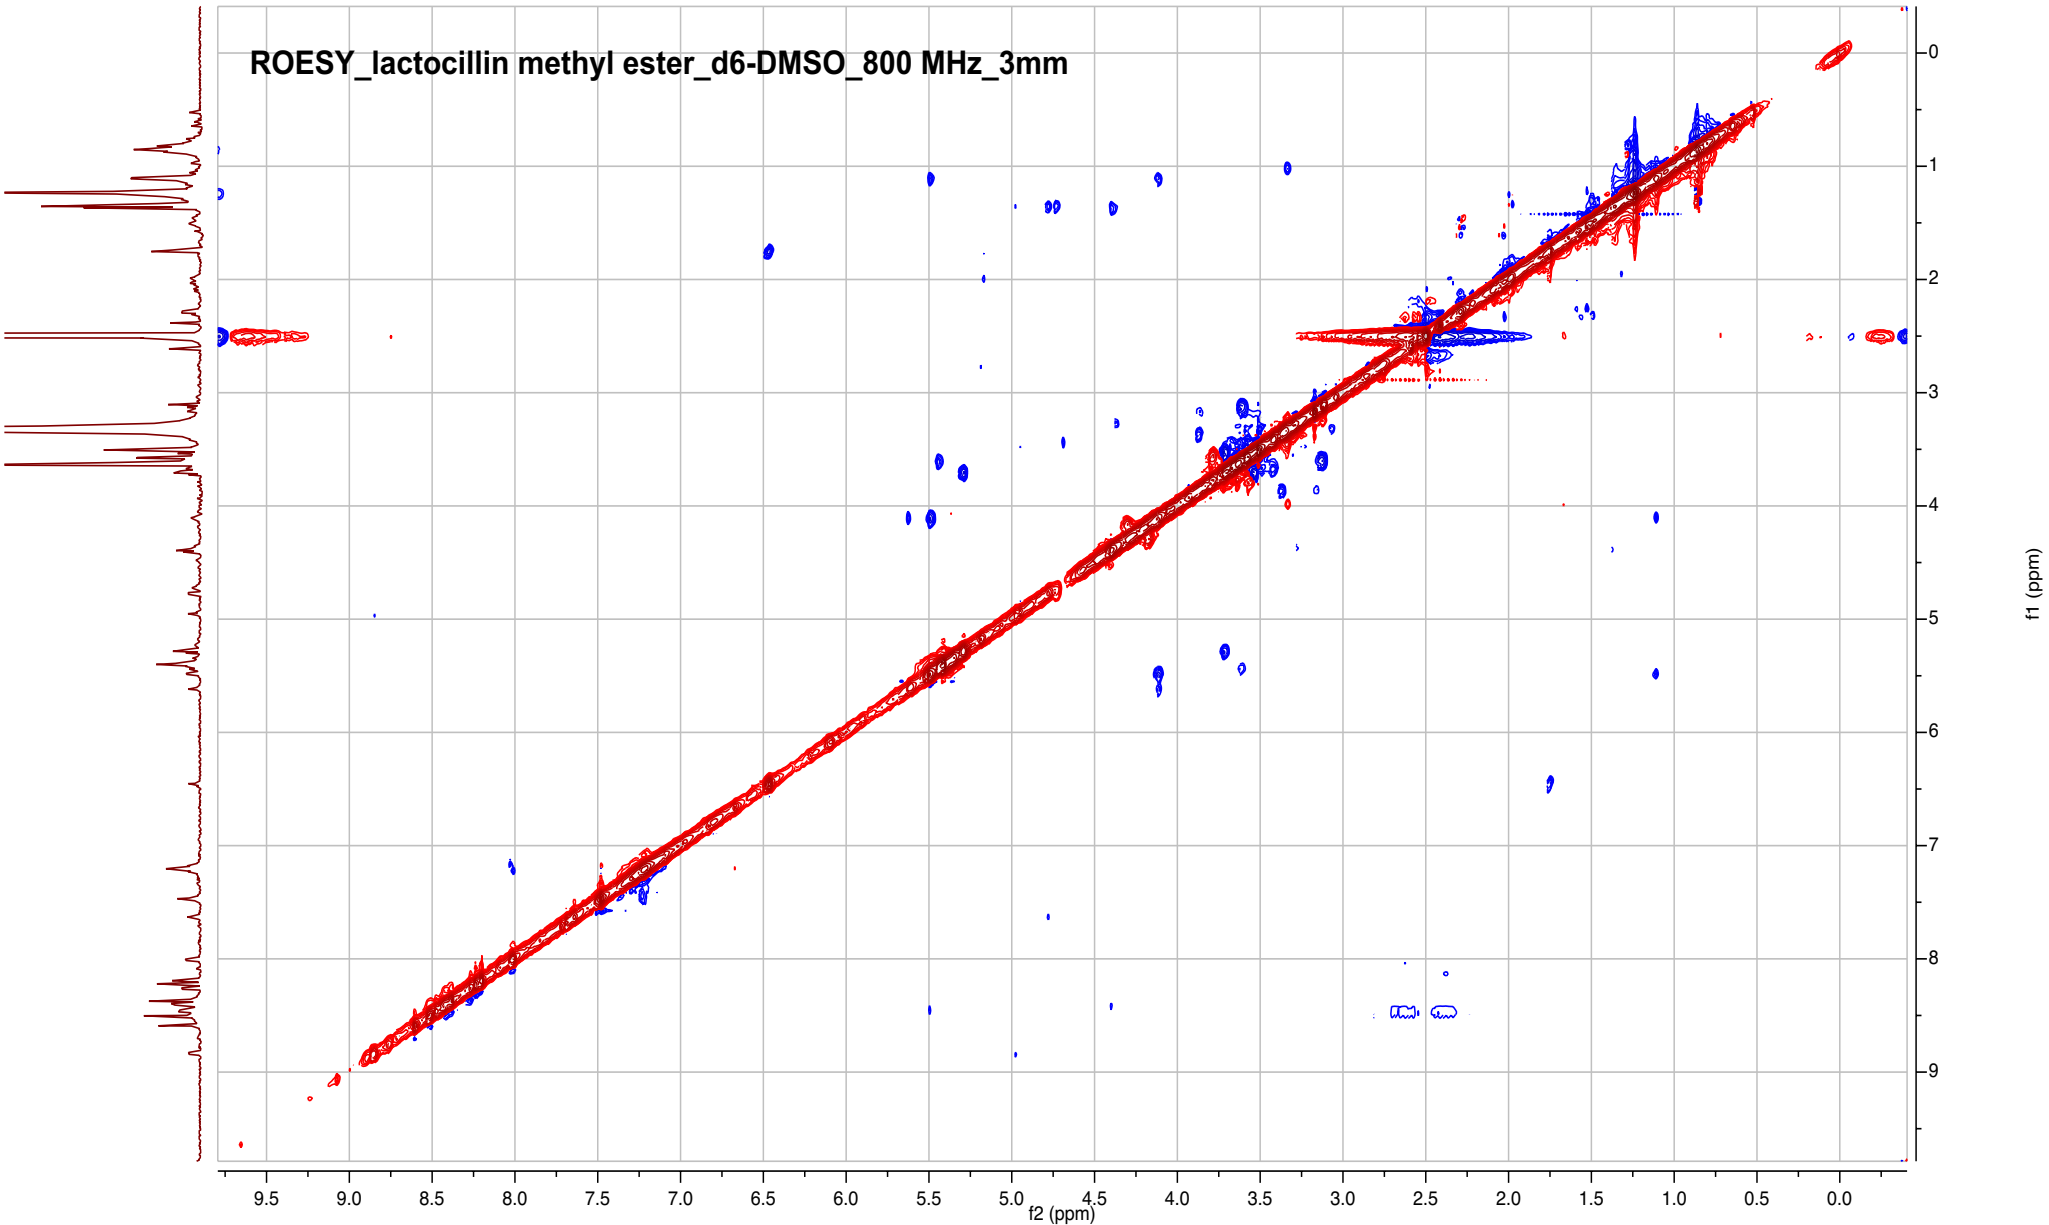

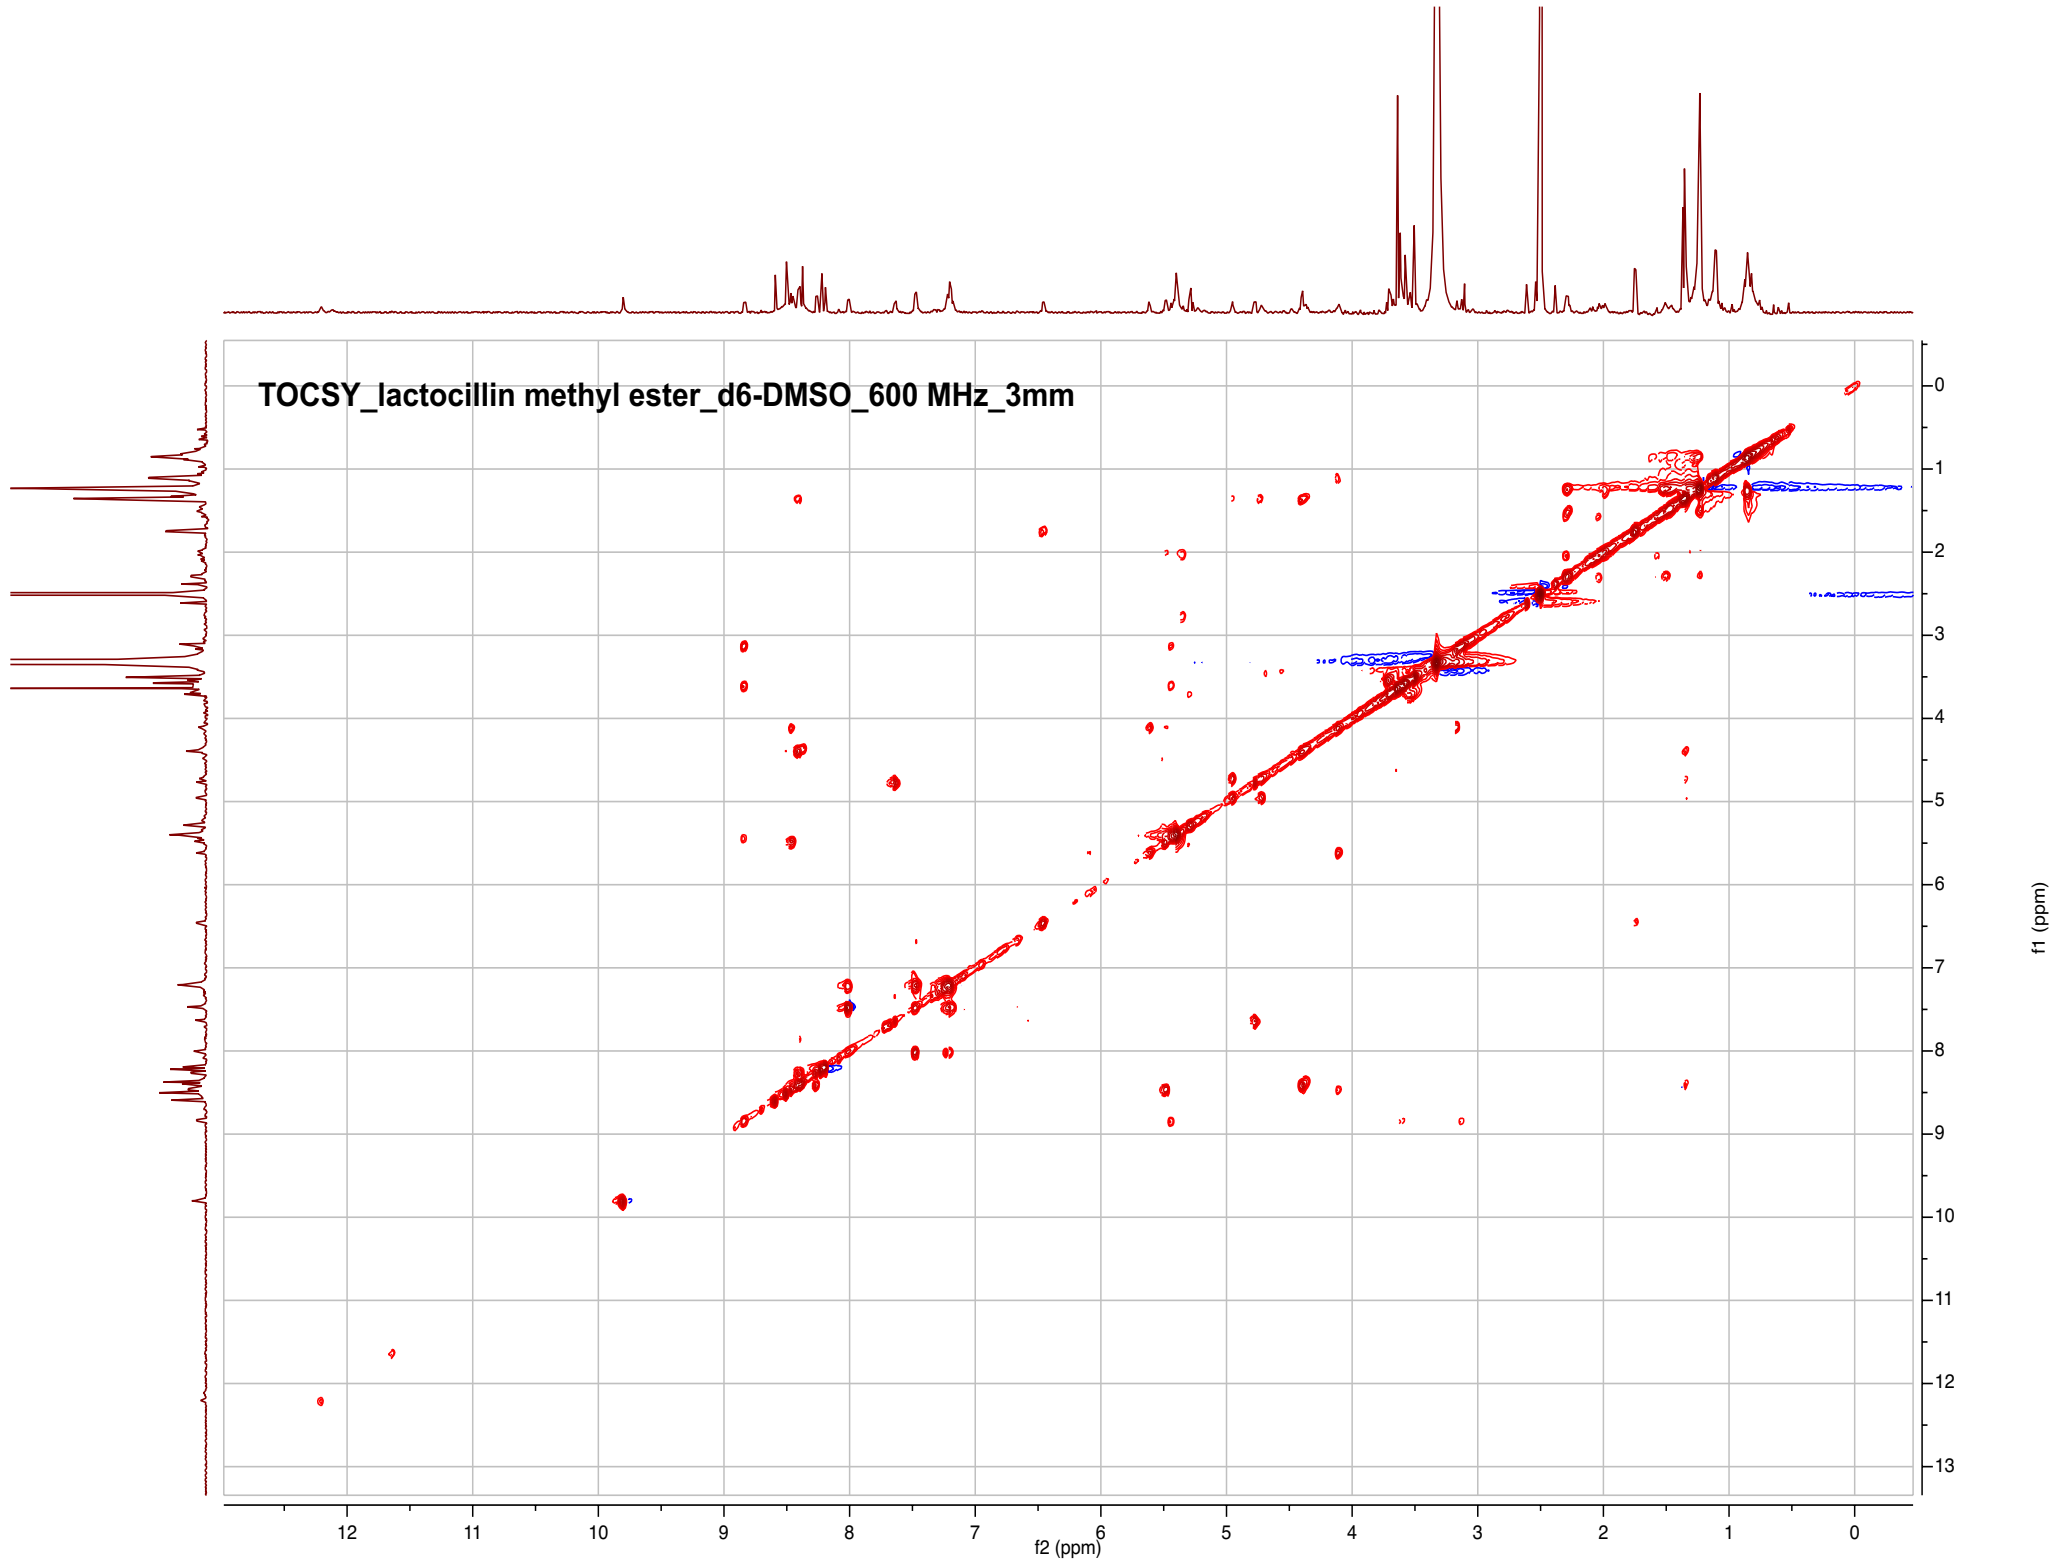

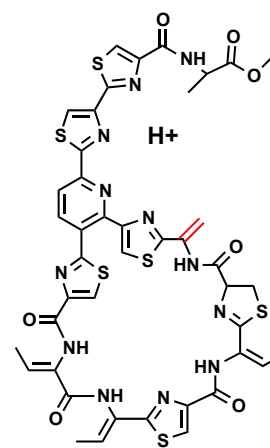

Chemical Formula:  $C_{43}H_{37}N_{12}O_7S_6^+$   
 Calculated Exact Mass: 1025.12323  
 Observed Exact Mass: 1025.12187  
 01.3 ppm

CID/35

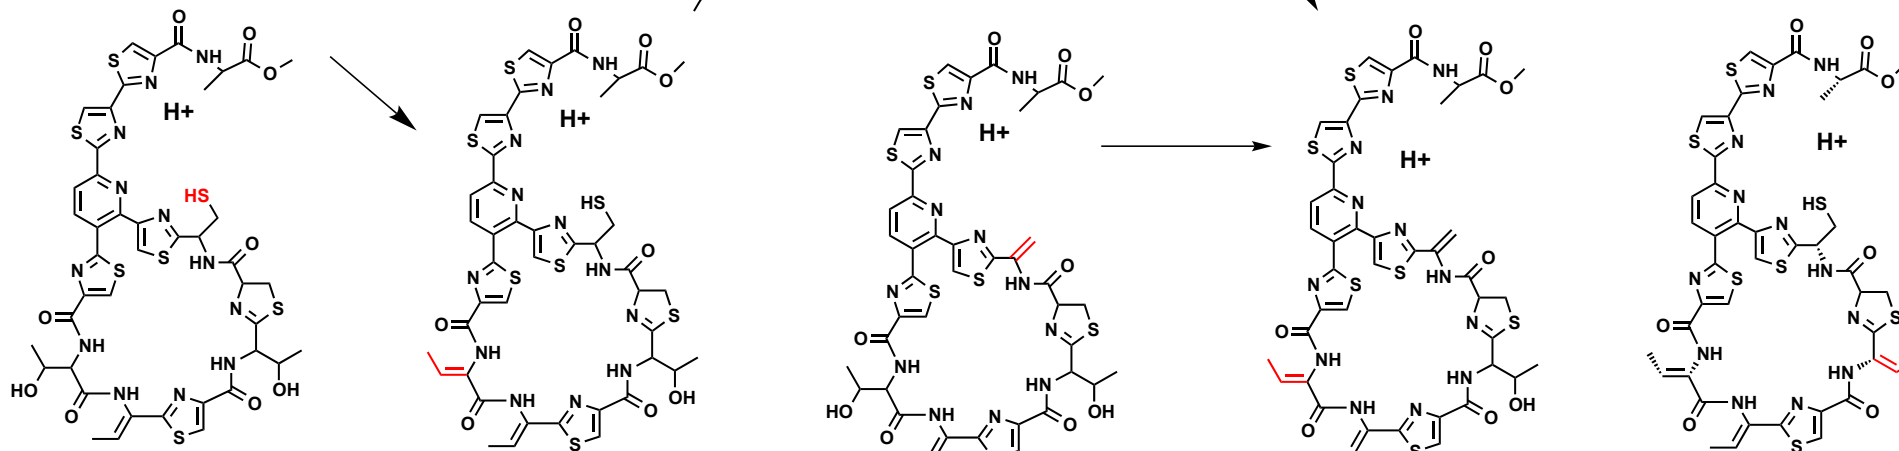

Chemical Formula:  $C_{43}H_{43}N_{12}O_9S_7^+$     Chemical Formula:  $C_{43}H_{41}N_{12}O_8S_7^+$     Chemical Formula:  $C_{43}H_{41}N_{12}O_9S_6^+$     Chemical Formula:  $C_{43}H_{39}N_{12}O_8S_6^+$     Chemical Formula:  $C_{43}H_{39}N_{12}O_7S_7^+$   
 Calculated Exact Mass: 1095.13207    Calculated Exact Mass: 1077.12151    Calculated Exact Mass: 1061.14435    Calculated Exact Mass: 1043.13379    Calculated Exact Mass: 1059.11095  
 Observed Exact Mass: 1095.13268    Observed Exact Mass: 1077.12203    Observed Exact Mass: 1061.14433    Observed Exact Mass: 1043.13345    Observed Exact Mass: 1059.11080  
 0.5 ppm    0.5 ppm    -0.02 ppm    -0.3 ppm    -0.1 ppm

HCD/35

Chemical Formula:  $C_{52}H_{48}N_{13}O_{10}S_7^+$   
 Calculated Exact Mass: 1238.16919  
 Observed Exact Mass: 1238.16916  
 -0.02 ppm

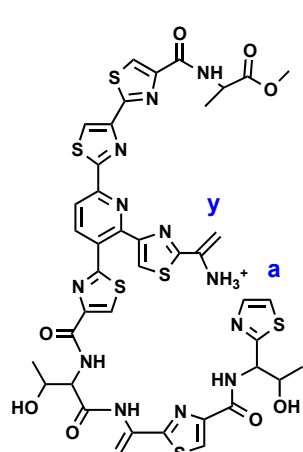

Chemical Formula:  $C_{42}H_{41}N_{12}O_8S_6^+$   
 Calculated Exact Mass: 1033.14944  
 Observed Exact Mass: 1033.15260  
 3 ppm

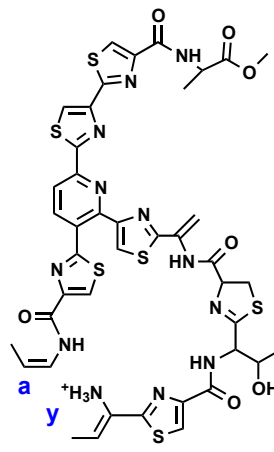

Chemical Formula:  $C_{42}H_{41}N_{12}O_7S_6^+$   
 Calculated Exact Mass: 1017.15452  
 Observed Exact Mass: 1017.15650  
 2 ppm

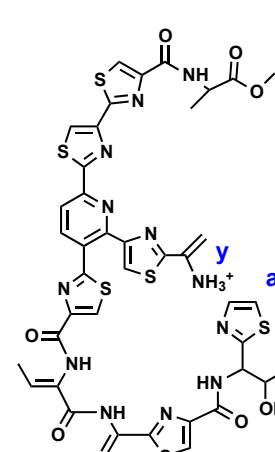

Chemical Formula:  $C_{42}H_{39}N_{12}O_7S_6^+$   
 Calculated Exact Mass: 1015.13887  
 Observed Exact Mass: 1015.13887  
 0 ppm

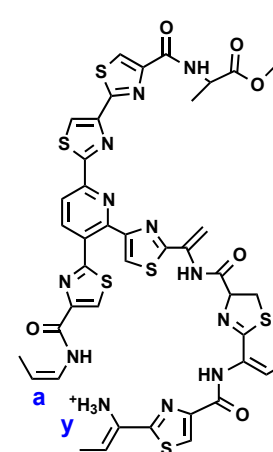

Chemical Formula:  $C_{42}H_{39}N_{12}O_6S_6^+$   
 Calculated Exact Mass: 999.14396  
 Observed Exact Mass: 999.14389  
 -0.07 ppm

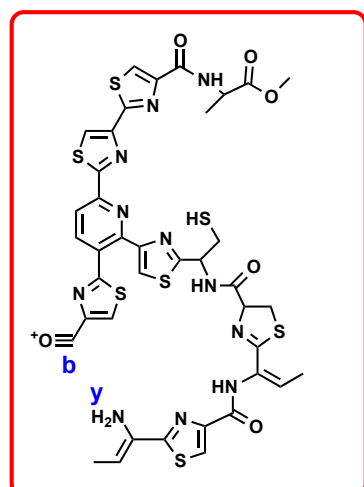

Chemical Formula:  $C_{39}H_{34}N_{11}O_6S_7^+$   
 Calculated Exact Mass: 976.07384  
 Observed Exact Mass: 976.07460  
 -0.8 ppm

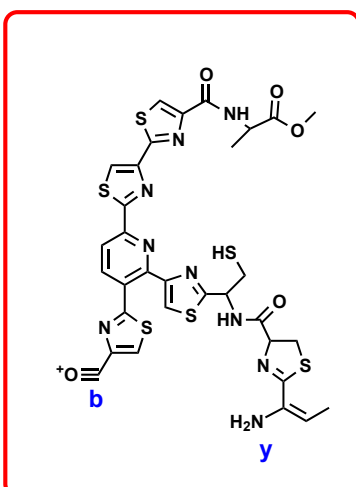

Chemical Formula:  $C_{32}H_{28}N_9O_5S_6^+$   
 Calculated Exact Mass: 810.05375  
 Observed Exact Mass: 810.05343  
 -0.4 ppm

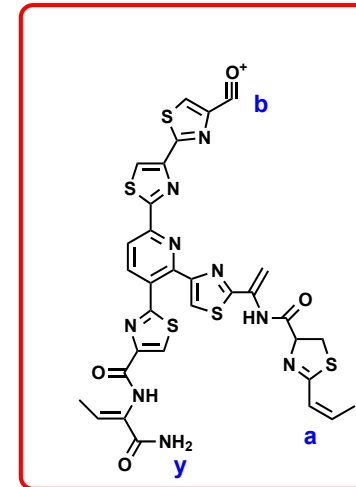

Chemical Formula:  $C_{32}H_{24}N_9O_4S_5^+$   
 Calculated Exact Mass: 758.05547  
 Observed Exact Mass: 758.05552  
 0.06 ppm

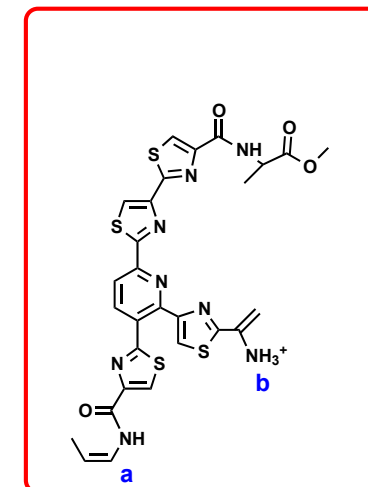

Chemical Formula:  $C_{28}H_{25}N_8O_4S_4^+$   
 Calculated Exact Mass: 665.08815  
 Observed Exact Mass: 665.08798  
 -0.3 ppm

**Chemical shifts of lactocillin in DMSO-*d*<sub>6</sub> (600 MHz)**

| Position | $\delta$ H (ppm) | m                 | J (Hz)    | $\delta$ C (ppm) <sup>a</sup> | Residue    |
|----------|------------------|-------------------|-----------|-------------------------------|------------|
| 1        | 3.64             | s                 | -         | 51.8                          | Ala        |
| 2        | -                | -                 | -         | 172.5                         | Ala        |
| 3        | 4.39             | m <sup>b</sup>    | -         | 47.5                          | Ala        |
| 4        | 1.36             | d                 | 7.0       | 16.7                          | Ala        |
| 5        | 8.41             | d                 | 7.2       | NH                            | Ala        |
| 6        | -                | -                 | -         | 169.8                         | Thiazole 1 |
| 7        | -                | -                 | -         | n.o.                          | Thiazole 1 |
| 8        | 8.59             | s                 | -         | 125.3                         | Thiazole 1 |
| 9        | -                | -                 | -         | 167.2                         | Thiazole 1 |
| 10       | -                | -                 | -         | n.o.                          | Thiazole 2 |
| 11       | 8.50             | s                 | -         | 125.7                         | Thiazole 2 |
| 12       | -                | -                 | -         | 164.8                         | Thiazole 2 |
| 13       | -                | -                 | -         | n.o.                          | Pyridine   |
| 14       | 8.39             | d                 | 8.0       | 141.8                         | Pyridine   |
| 15       | 8.27             | d                 | 8.1       | 118.5                         | Pyridine   |
| 16       | -                | -                 | -         | n.o.                          | Pyridine   |
| 17       | -                | -                 | -         | n.o.                          | Pyridine   |
| 18       | -                | -                 | -         | n.o.                          | Thiazole 3 |
| 19       | 8.37             | s                 | -         | 125.6                         | Thiazole 3 |
| 20       | -                | -                 | -         | 168.7                         | Thiazole 3 |
| 21       | 5.44             | m <sup>b</sup>    | -         | 50.7                          | Cys        |
| 22       | 3.13             | m <sup>b</sup>    | -         | 30.3                          | Cys        |
|          | 3.61             | m <sup>b</sup>    | -         | 30.3                          | Cys        |
| 23       | -                | -                 | -         | n.o.                          | Indole     |
| 24       | -                | -                 | -         | 114.5                         | Indole     |
| 25       | 8.19             | br s              | -         | 132.4                         | Indole     |
| 26       | 12.2             | br s              | -         | NH                            | Indole     |
| 27       | -                | -                 | -         | 136.2                         | Indole     |
| 28       | 7.47             | d                 | 7.3       | 112.2                         | Indole     |
| 29       | 7.22             | m <sup>b</sup>    | -         | 122.6                         | Indole     |
| 30       | 7.19             | m <sup>b</sup>    | -         | 121.8                         | Indole     |
| 31       | 8.01             | d                 | 8.2       | 120.2                         | Indole     |
| 32       | -                | -                 | -         | 124.2                         | Indole     |
| 33       | 8.84             | d                 | 9.7       | NH                            | Cys        |
| 34       | -                | -                 | -         | n.o.                          | Thiazoline |
| 35       | 5.28             | dd                | 9.4, 9.4  | 78.8                          | Thiazoline |
| 36       | 3.53             | dd                | 9.0, 11.3 | 34.4                          | Thiazoline |
|          | 3.70             | dd                | 9.8, 11.0 | 34.4                          | Thiazoline |
| 37       | -                | -                 | -         | 169.8                         | Thiazoline |
| 38       | 5.48             | dd                | 3.7, 9.7  | 54.3                          | Thr 1      |
| 39       | 4.1              | br m <sup>b</sup> | -         | 68.0                          | Thr 1      |
| 40       | 1.11             | d                 | 6.2       | 19.8                          | Thr 1      |
| 41       | 5.61             | br m <sup>b</sup> | -         | OH                            | Thr 1      |
| 42       | 8.46             | d                 | 9.3       | NH                            | Thr 1      |
| 43       | -                | -                 | -         | n.o.                          | Thiazole 4 |
| 44       | -                | -                 | -         | n.o.                          | Thiazole 4 |
| 45       | 8.23             | s                 | -         | 121.6                         | Thiazole 4 |
| 46       | -                | -                 | -         | 166.1                         | Thiazole 4 |



|    |      |                   |     |       |            |
|----|------|-------------------|-----|-------|------------|
| 47 | -    | -                 | -   | n.o.  | Dhb        |
| 48 | 6.46 | q                 | 7.1 | 128.5 | Dhb        |
| 49 | 1.75 | d                 | 7.0 | 13.2  | Dhb        |
| 50 | 9.80 | s                 | -   | NH    | Dhb        |
| 51 | -    | -                 | -   | n.o.  | Thr 2      |
| 52 | 4.77 | d                 | 9.6 | 56.0  | Thr 2      |
| 53 | 4.73 | br m <sup>b</sup> | -   | 69.1  | Thr 2      |
| 54 | 1.35 | d                 | 7.2 | 21.0  | Thr 2      |
| 55 | 4.95 | d                 | 4.6 | OH    | Thr 2      |
| 56 | 7.64 | d                 | 8.4 | NH    | Thr 2      |
| 57 | -    | -                 | -   | n.o.  | Thiazole 5 |
| 58 | -    | -                 | -   | n.o.  | Thiazole 5 |
| 59 | 8.22 | s                 | -   | 123.8 | Thiazole 5 |
| 60 | -    | -                 | -   | 166.1 | Thiazole 5 |

<sup>a</sup> Chemical shifts determined from gHSQC and gHMBC NMR data (800 MHz). <sup>b</sup>

Multiplicities unresolved due to signal overlap or broadening. n.o.- Resonance not observed in two dimensional heteronuclear spectra. The relative positions of the five distinct thiazoles and the two distinct threonines cannot be differentiated based on the NMR data.
