# Supplementary material
Source: PubMed Central journal article supplement (PMC4164201)

***bgc67* (Sample SRS011306\_Score 102)**

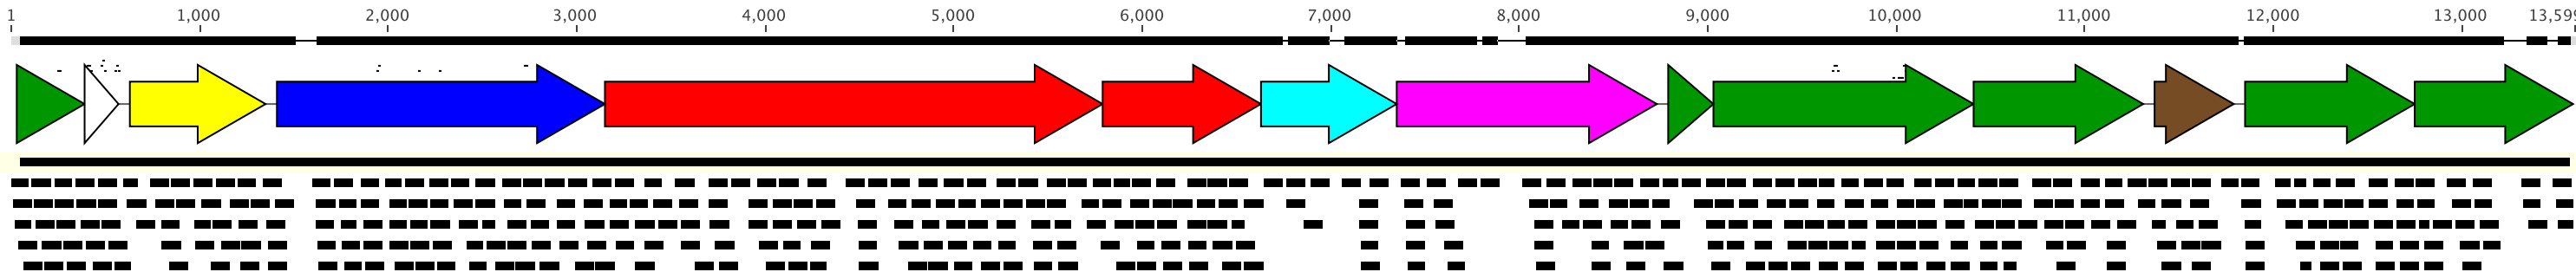

# *bgc67* (Sample SRS011310\_Score 1000)

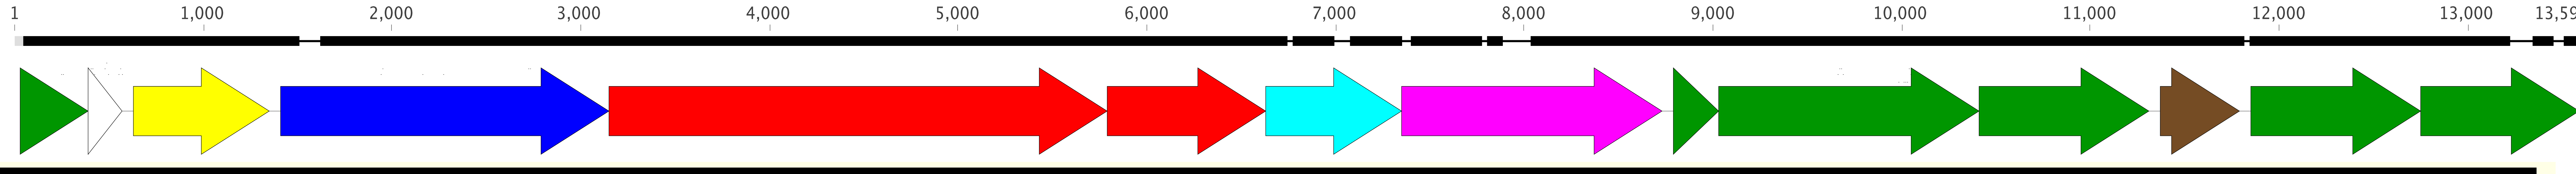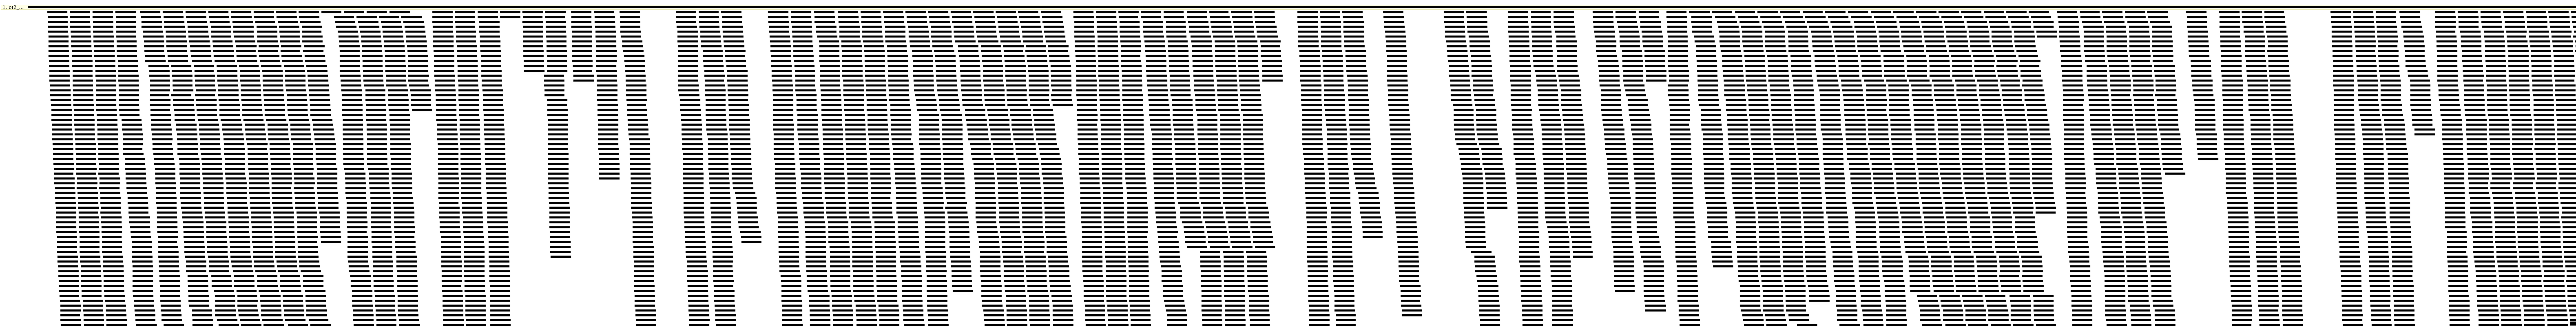

# *bgc58* (Sample 013825\_Score19)

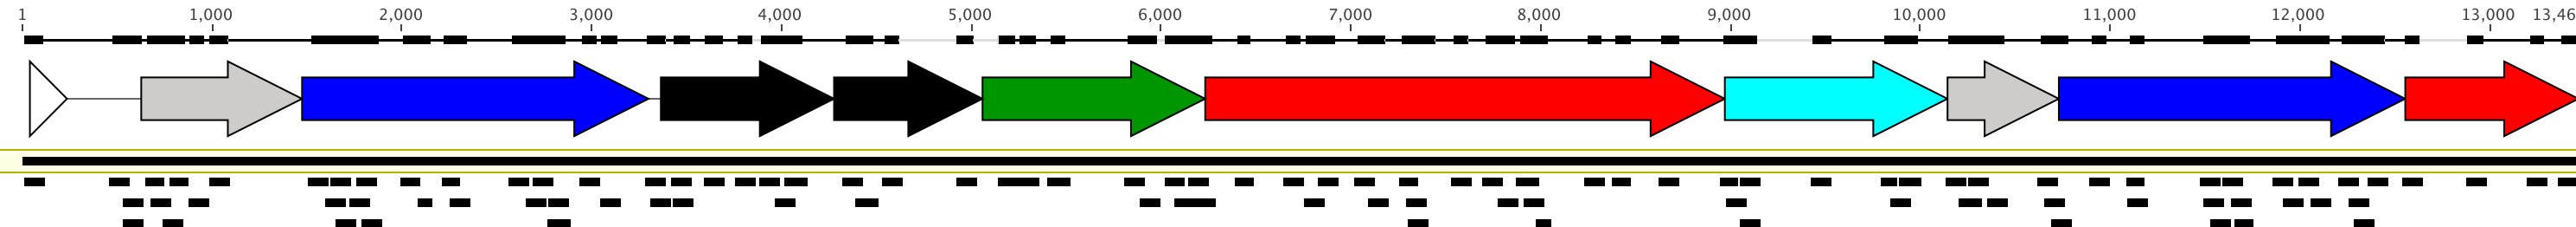

# *bgc58* (Sample 011306\_Score 50)

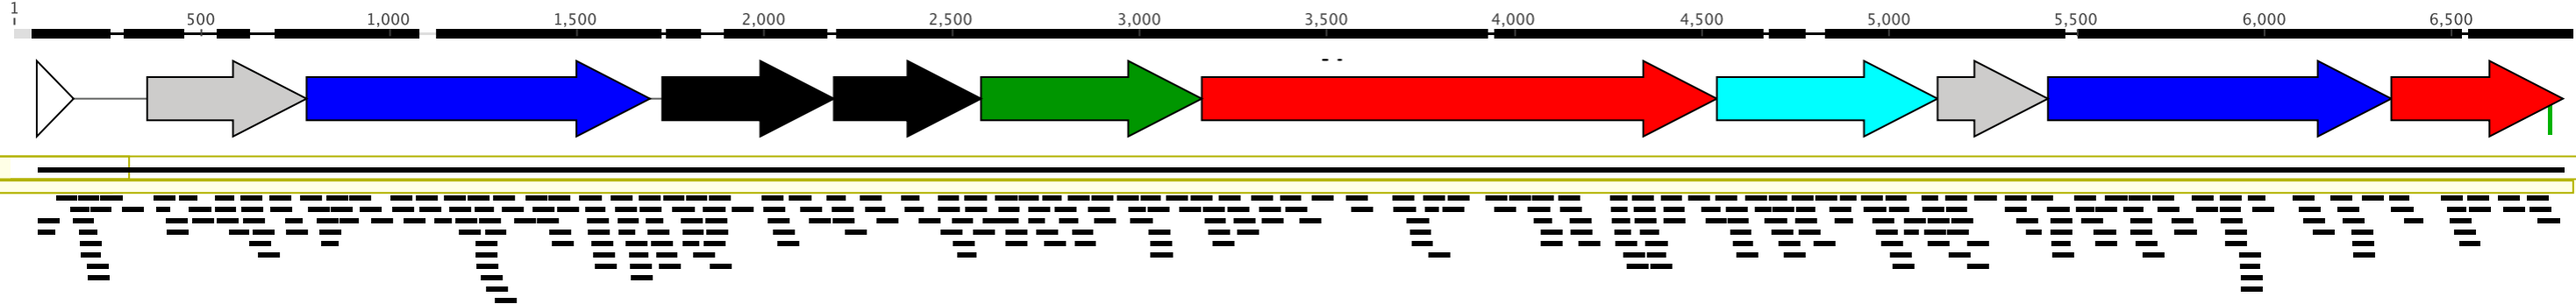

*bgc58* (Sample 015038\_Score1000)

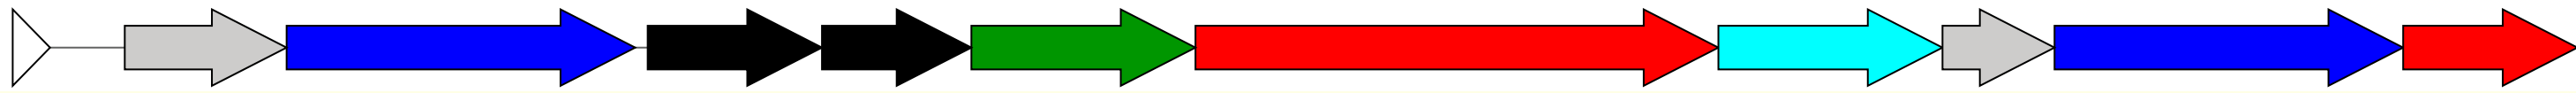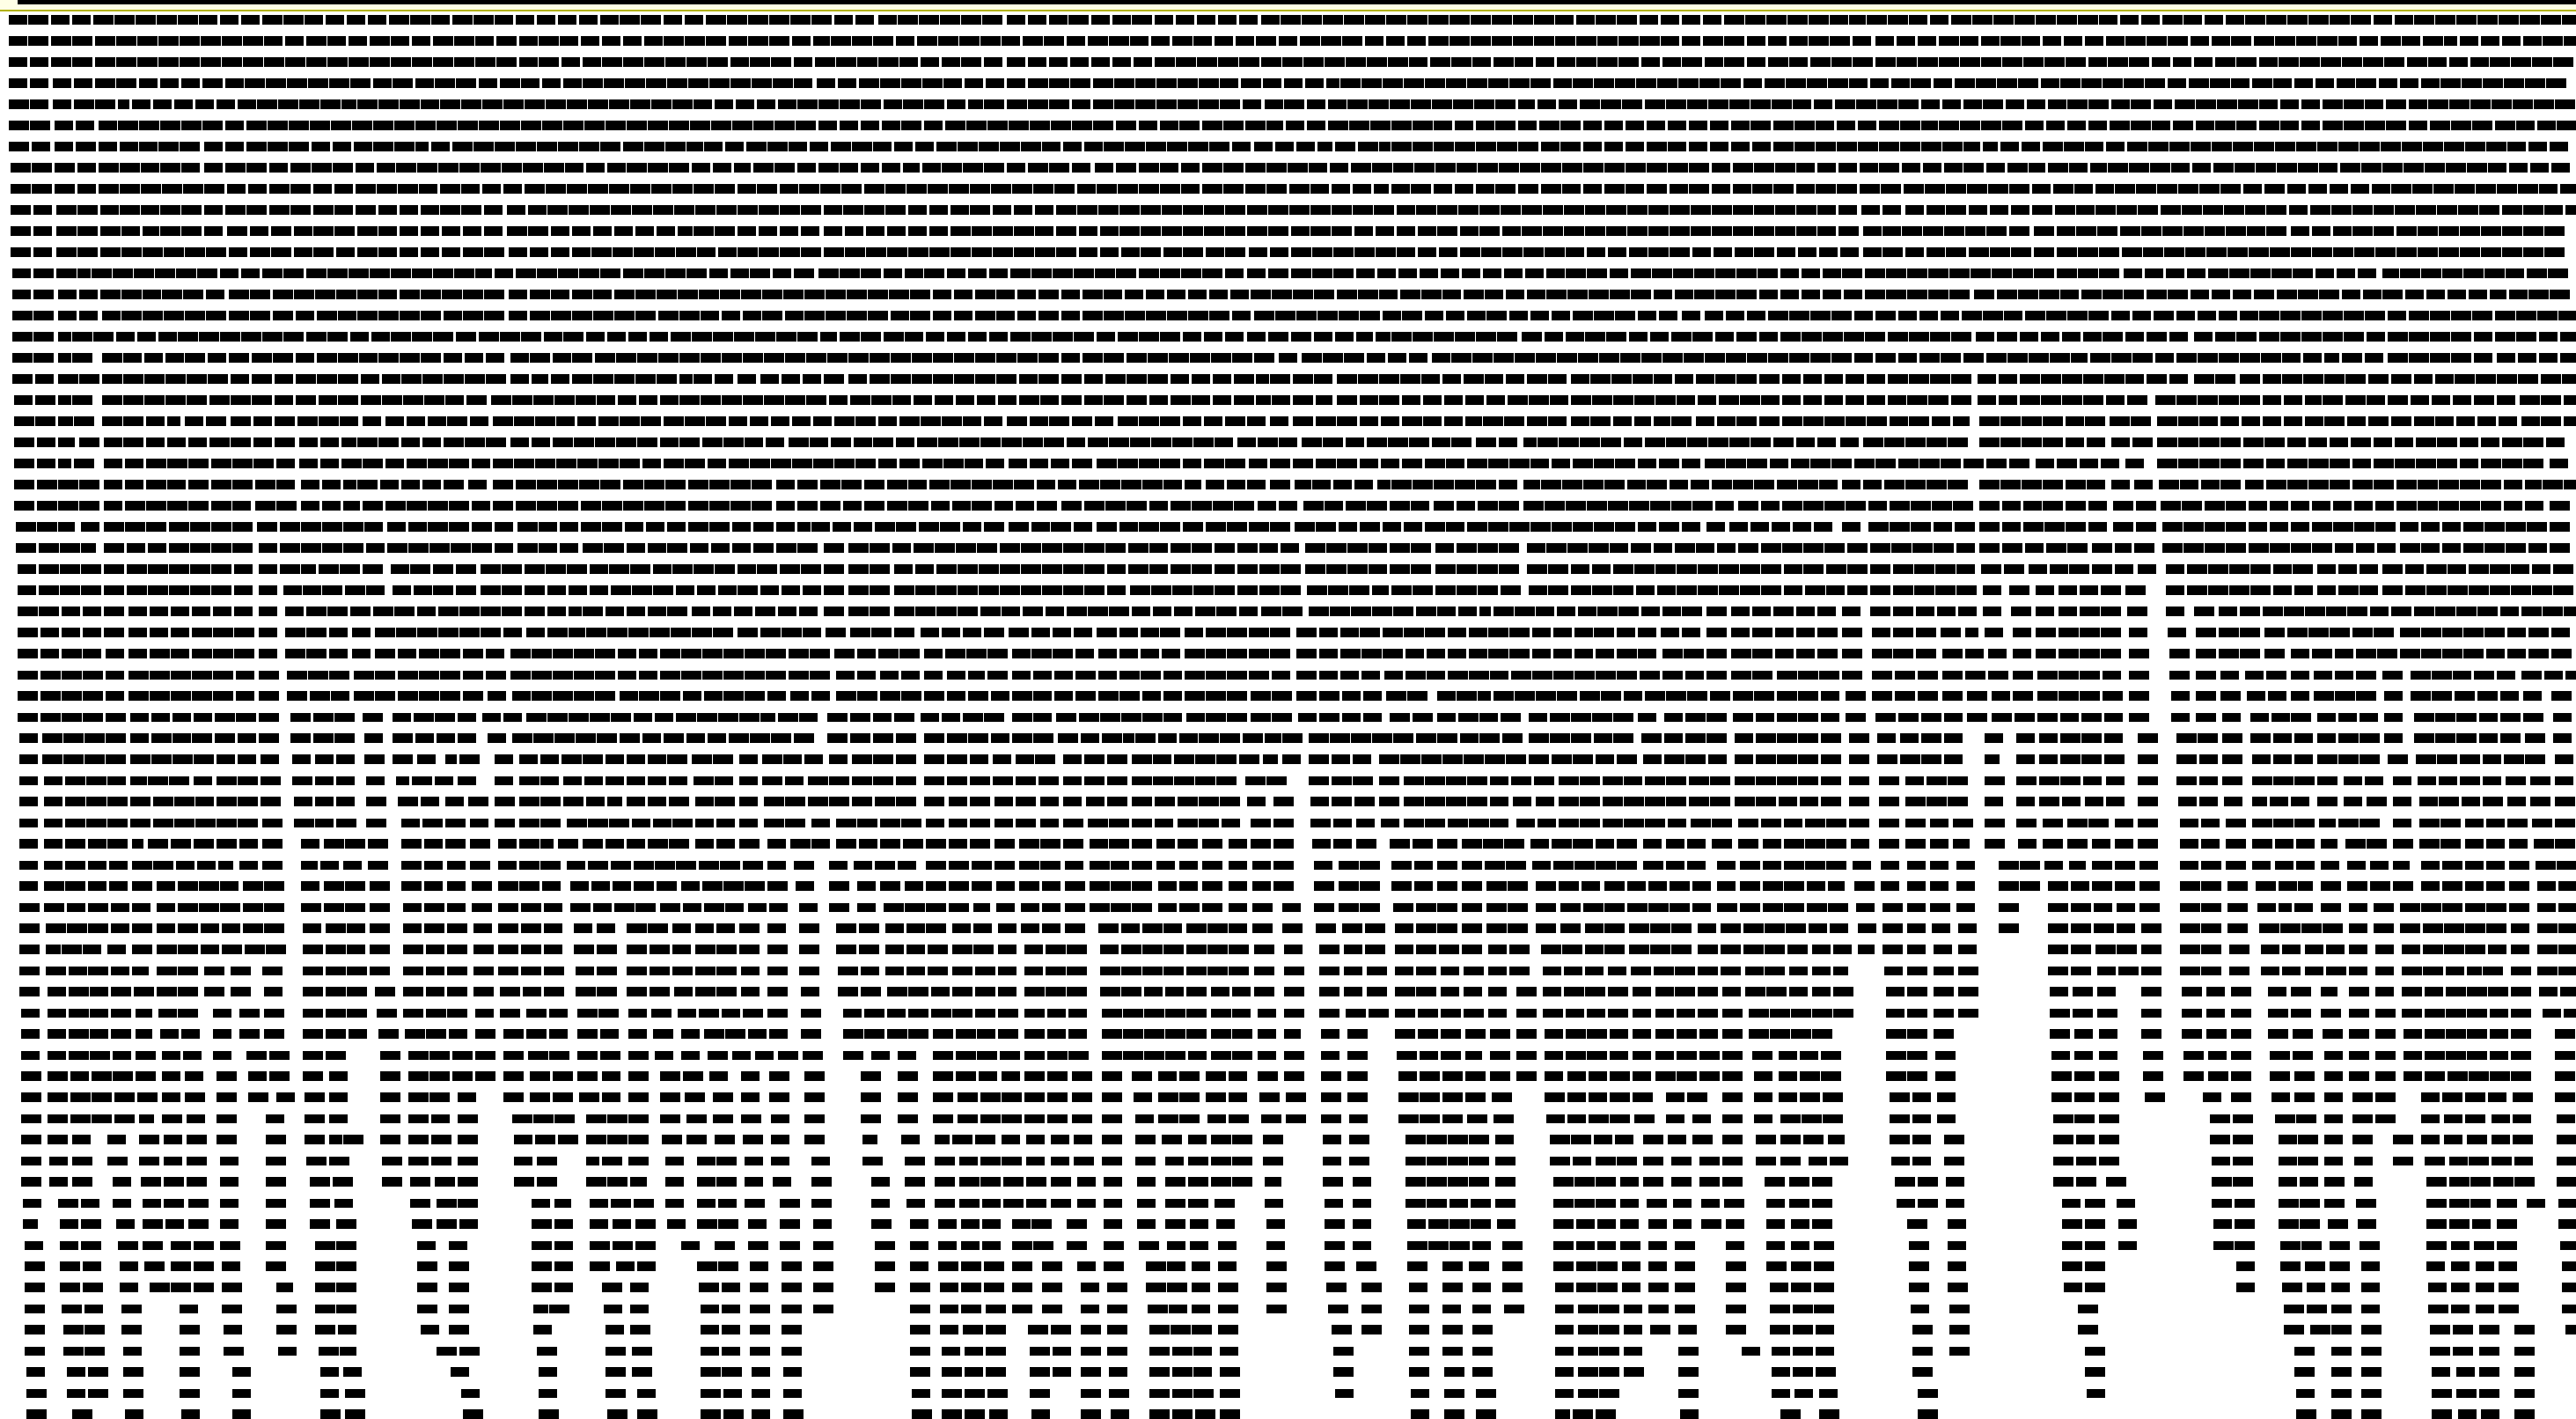

# *bgc68* (Sample\_SRS017445\_Score\_0)

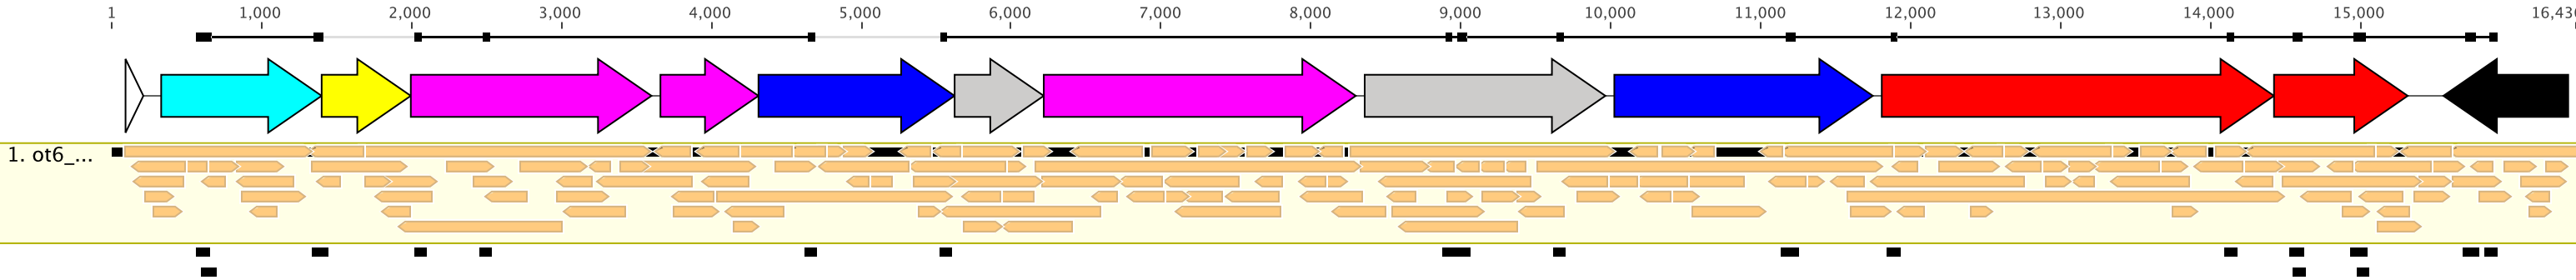

# *bgc68* (Sample\_SRS015440\_Score\_31)

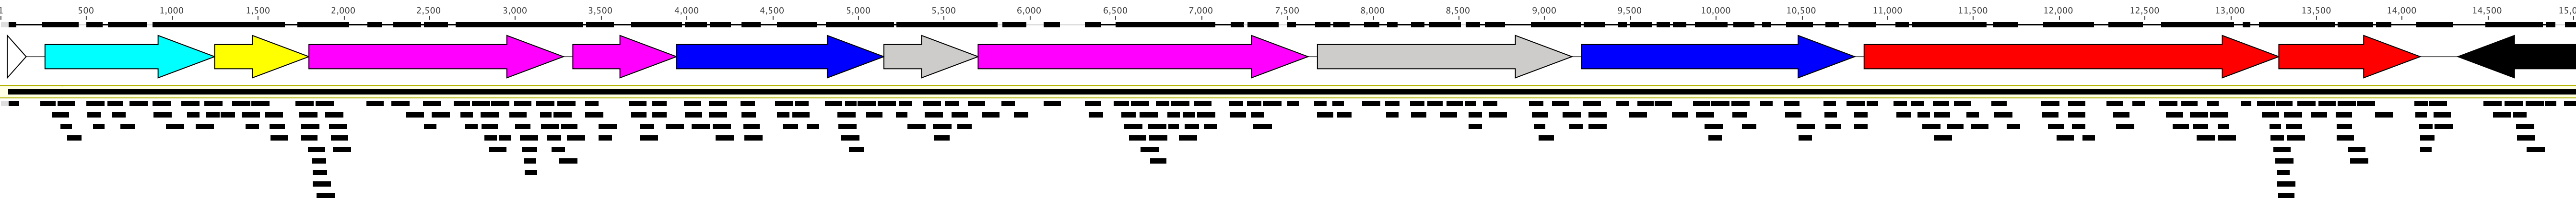

***bgc68* (Sample\_SRS013170\_Score\_71)**

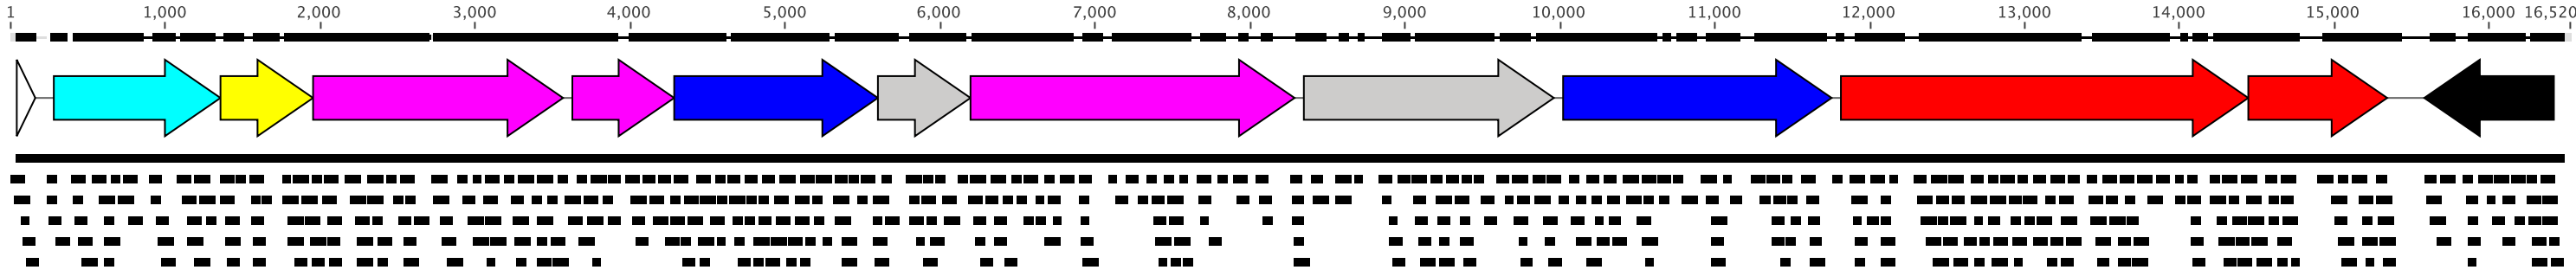



# bgc68 (Sample\_SRS053917\_Score\_572)

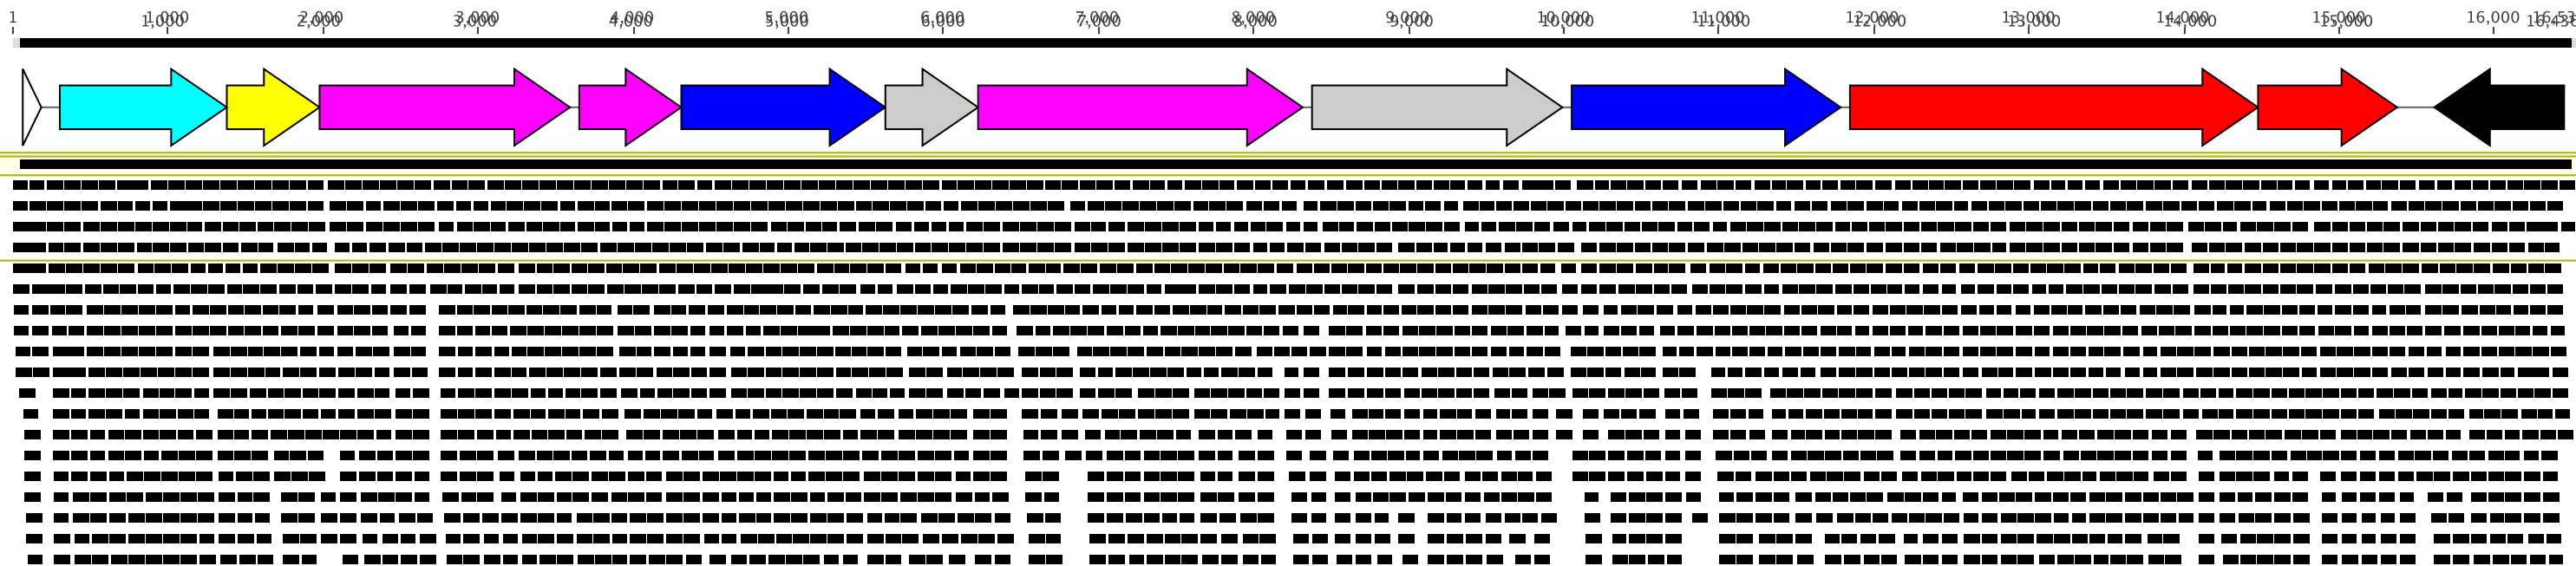

Supplement: NIHMS626364-supplement-11.pdf [file NIHMS626364-supplement-11.pdf]
