# Supplementary material
Source: PubMed Central journal article supplement (PMC4164201)

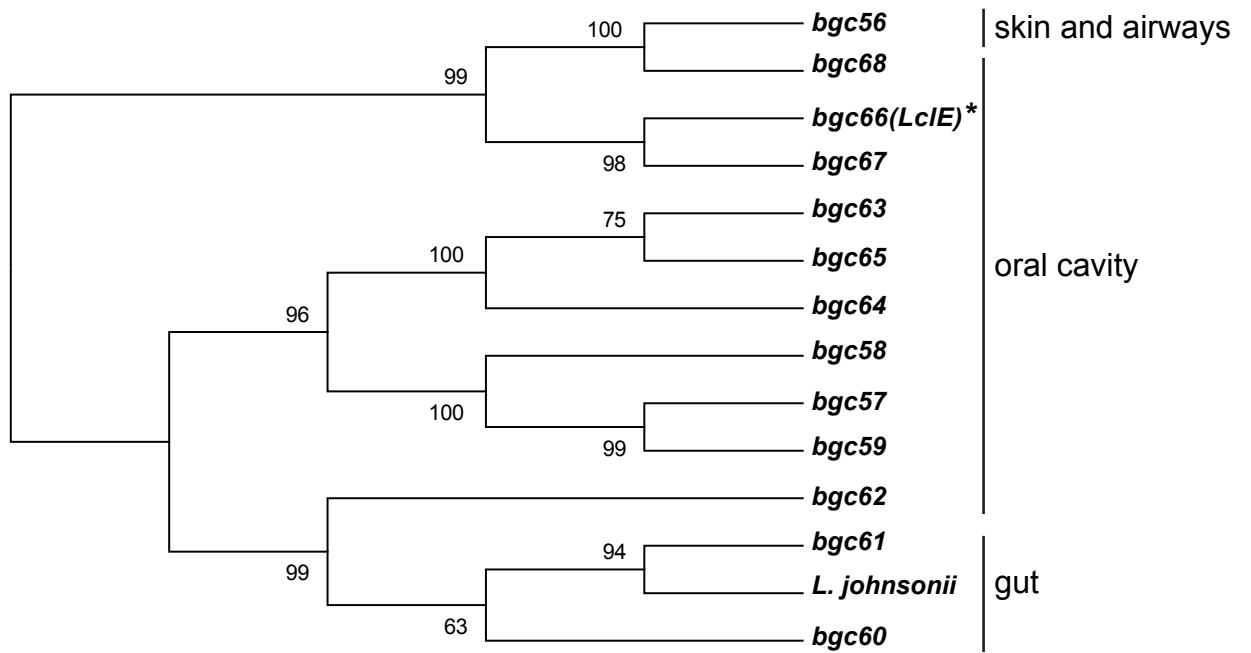

\*found also in urogenital tract (vaginal flora)

Supplement: NIHMS626364-supplement-6.pdf [file NIHMS626364-supplement-6.pdf]

**A**

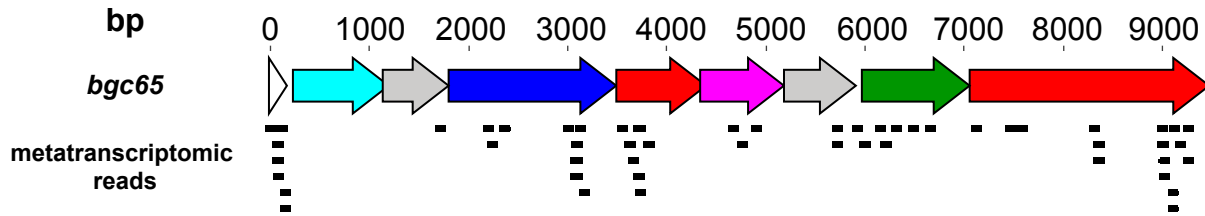

**B**

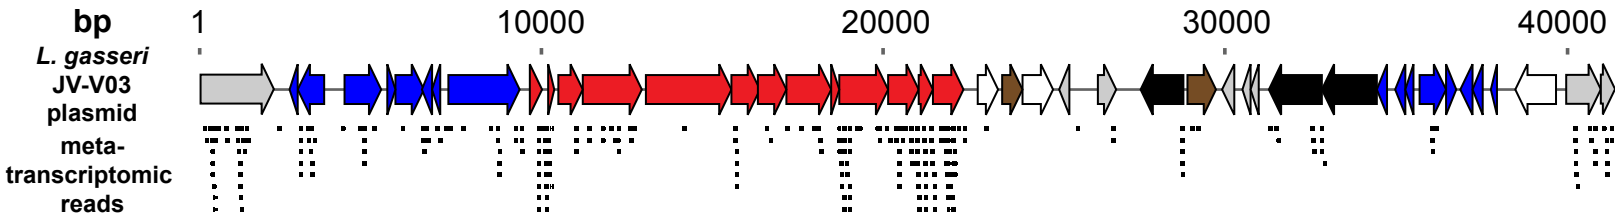

Supplement: NIHMS626364-supplement-8.pdf [file NIHMS626364-supplement-8.pdf]
